# Supplementary material for: Design, synthesis, antimicrobial and antioxidant evaluation, cytotoxicity assessment, and molecular dynamics-based computational studies of novel PABA analogues as dual DHPS/DHFR inhibitors
Source: Royal Society of Chemistry journal article supplement (doi:10.1039/d6ra01925k), 2026-05-18
Supplement: d6ra01925k1.pdf [file d6ra01925k1.pdf]

## **Design, Synthesis, Antimicrobial and Antioxidant Evaluation, Cytotoxicity Assessment, and Molecular Dynamics-Based Computational Studies of Novel PABA Analogues as Dual DHPS/DHFR Inhibitors**

Bhargav Devliya<sup>a</sup>, Ahmed K. Al-Kubeisi<sup>b</sup>, Drashti Patel<sup>c</sup>, Milan Dabhi<sup>c</sup>, Bimalkumar Patel<sup>a</sup>, Milan Thakar<sup>d</sup>, Jaykumar Nagapara<sup>a</sup>, Shreya Chauhan<sup>e</sup>, Kiransinh Rajput<sup>c</sup>, Dweipayan Goswami<sup>c</sup>, Nandan Dixit<sup>e</sup>, Saumya K. Patel<sup>e</sup>, Gaurang Sindhav<sup>d</sup>, Botros Y. Beshay<sup>f</sup>, Hitesh D. Patel<sup>a\*</sup>

<sup>a</sup>Department of Chemistry, School of Sciences, Gujarat University, Ahmedabad, India.

<sup>b</sup>College of Pharmacy University of Al Maarif, Al Anbar, 31001, Iraq.

<sup>c</sup>Department of Microbiology, School of Sciences, Gujarat University, Ahmedabad, India.

<sup>d</sup>Department of Zoology, School of Sciences, Gujarat University, Ahmedabad, India.

<sup>e</sup>Department of Bioinformatics, School of Sciences, Gujarat University, Ahmedabad, India.

<sup>f</sup>Pharmaceutical Sciences (Pharmaceutical Chemistry) Department, College of Pharmacy, Arab Academy for Science, Technology and Maritime Transport, Alexandria P.O. Box 1029, Egypt.

<sup>g</sup>Department of Environmental Science, School of Sciences, Gujarat University, Ahmedabad, India.

Corresponding author: Dr. Hitesh D. Patel

Email ID: [drhiteshpatel1@gmail.com](mailto:drhiteshpatel1@gmail.com)

### **Contents**

Figure S1. Mechanism of the reactions

Figure S2. ESI-MS spectrum of the lead molecule.

Figure S3. <sup>1</sup>H NMR spectrum of the lead molecule.

Figure S4. <sup>13</sup>C NMR spectrum of the lead molecule.

Figure S5. FTIR spectrum of SB1.

Figure S6. ESI-MS spectrum of SB1.

Figure S7. <sup>1</sup>H NMR spectrum of SB1.

Figure S8. <sup>13</sup>C NMR spectrum of SB1.

Figure S9: HPLC purity analysis for SB1

Figure S10. FTIR spectrum of SB2.

Figure S11. ESI-MS spectrum of SB2.

Figure S12. <sup>1</sup>H NMR spectrum of SB2.

Figure S13. <sup>13</sup>C NMR spectrum of SB2.

Figure S14: HPLC purity analysis for SB2

Figure S15. FTIR spectrum of SB3.

Figure S16. ESI-MS spectrum of SB3.

Figure S17. <sup>1</sup>H NMR spectrum of SB3.

Figure S18. <sup>13</sup>C NMR spectrum of SB3.

Figure S19: HPLC purity analysis for SB3

Figure S20. FTIR spectrum of SB4.

Figure S21. ESI-MS spectrum of SB4.

Figure S22. <sup>1</sup>H NMR spectrum of SB4.

Figure S23. <sup>13</sup>C NMR spectrum of SB4.

Figure S24: HPLC purity analysis for SB4

Figure S25. FTIR spectrum of SB5.

Figure S26. ESI-MS spectrum of SB5.

Figure S27. <sup>1</sup>H NMR spectrum of SB5.

Figure S28. <sup>13</sup>C NMR spectrum of SB5.

Figure S29: HPLC purity analysis for SB5.

Figure S30. FTIR spectrum of SB6.

Figure S31. ESI-MS spectrum of SB6.

Figure S32. <sup>1</sup>H NMR spectrum of SB6.

Figure S33. <sup>13</sup>C NMR spectrum of SB6.

Figure S34: HPLC purity analysis for SB6

Figure S35. FTIR spectrum of SB7.

Figure S36. ESI-MS spectrum of SB7.

Figure S37. <sup>1</sup>H NMR spectrum of SB7.

Figure S38. <sup>13</sup>C NMR spectrum of SB7.

Figure S39: <sup>19</sup>F NMR spectrum of SB7

Figure S40: HPLC purity analysis for SB7.

Figure S41: HPLC stability assay for SB2.

Figure S42. Images of inhibition zone of compound SB1-SB7 in comparison with SUL-TMP against MRSA

Figure S43. Images of inhibition zone of compound SB1-SB7 in comparison with Amoxicillin against *XDR E.coli*

Figure S44. Dose–response curve of compounds against DHPS

Figure S45. Dose–response curve of compounds against DHFR

Table S1. MIC Determination against MRSA and XDR *E.coli*

Figure S1: Reaction mechanism of synthesized compounds SB1-SB7

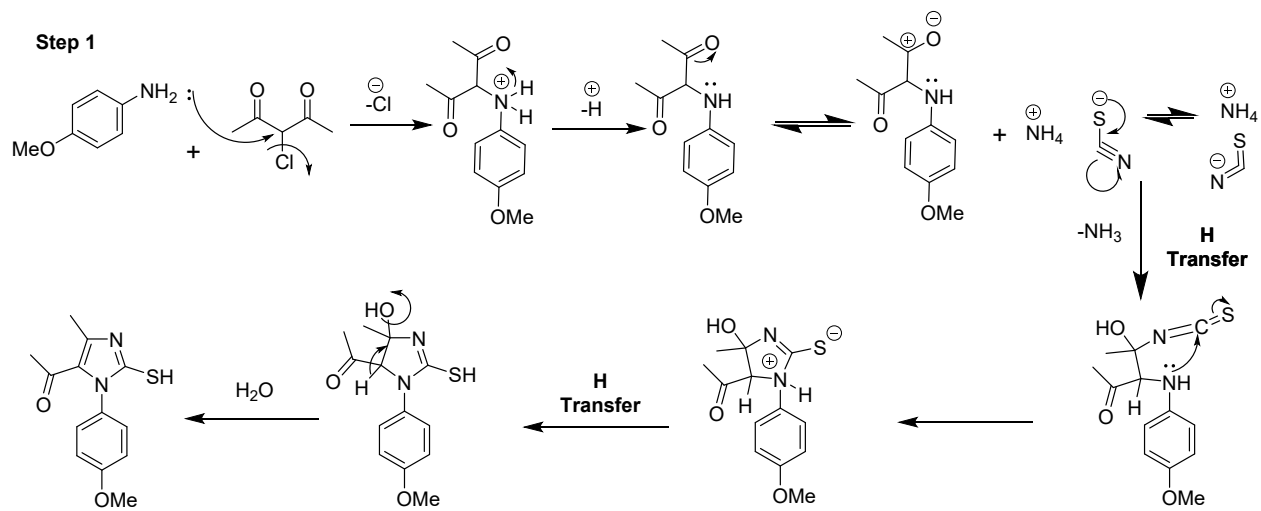

**Step 2**

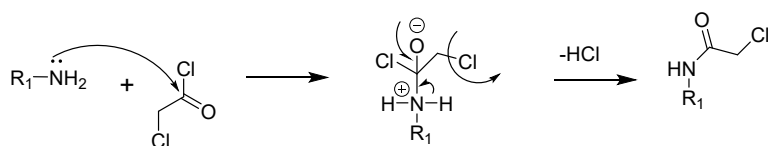

**Step 3**

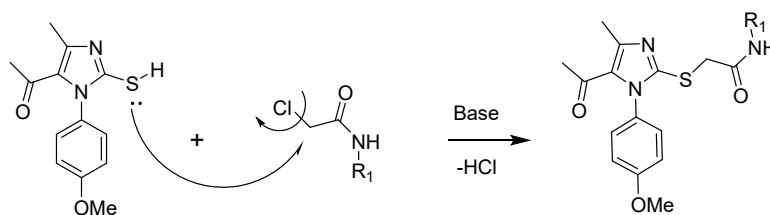

**Complete Characterization Data**

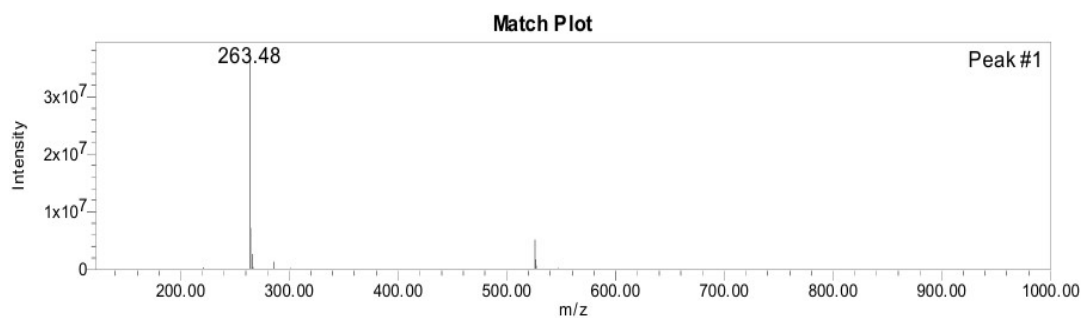

SampleName: DMInjection: 1 Name: Match1 Threshold: Base Peak 263.48 Channel Type 3D MS Channel  
Description 1: 120.00-1000.00 ES+, Centroid, CV=10

**Figure S2. ESI-MS spectrum of the lead molecule**

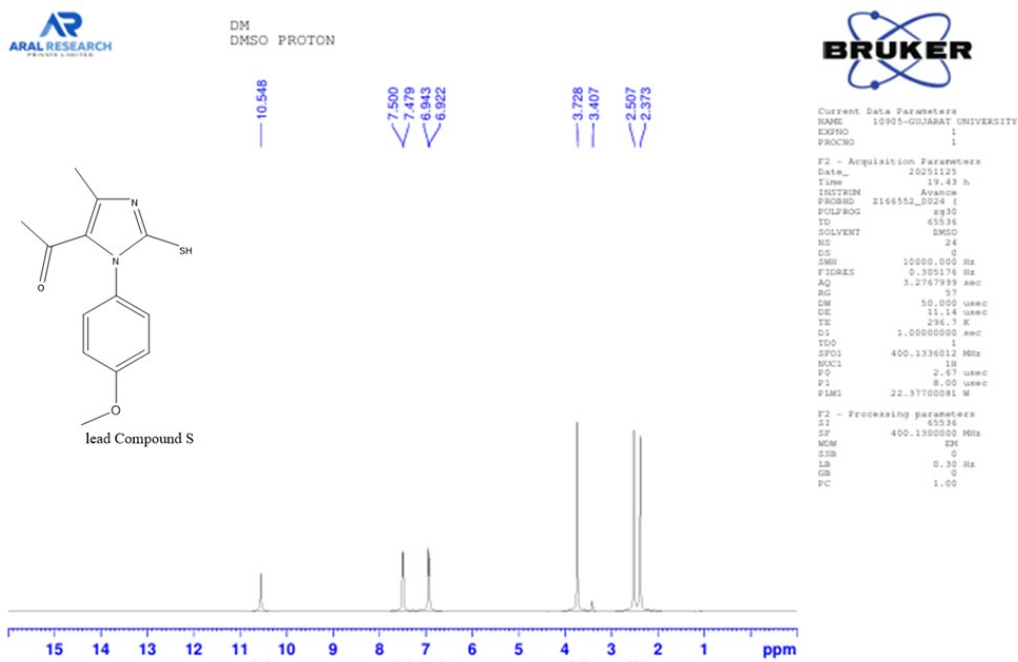

Figure S3. <sup>1</sup>H NMR spectrum of the lead molecule.

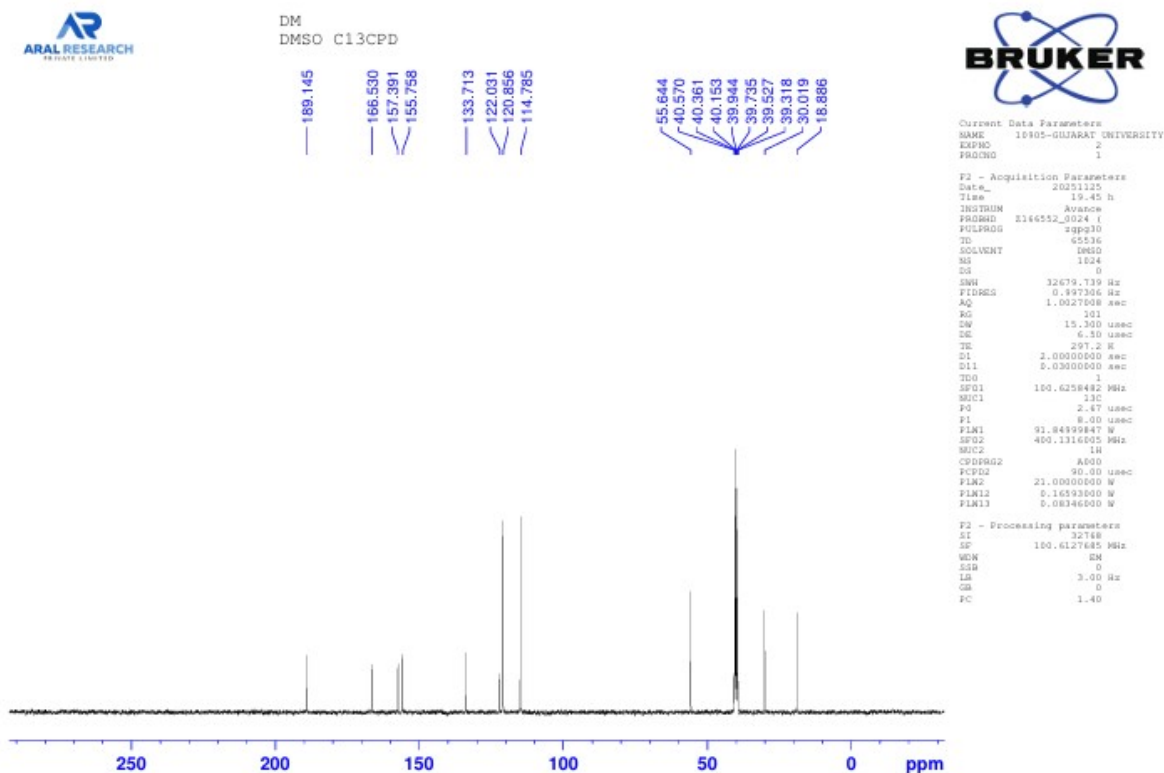

Figure S4. <sup>13</sup>C NMR spectrum of the lead molecule.

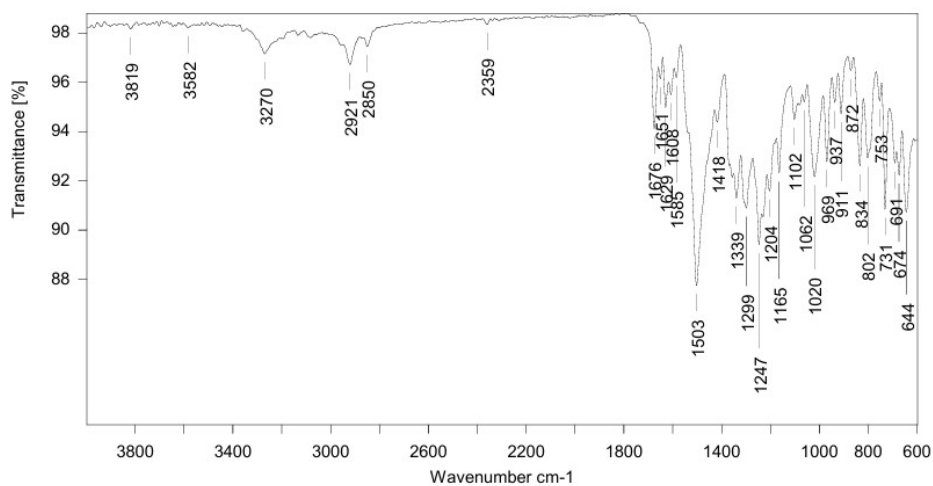

**Figure S5. FTIR spectrum of SB1.**

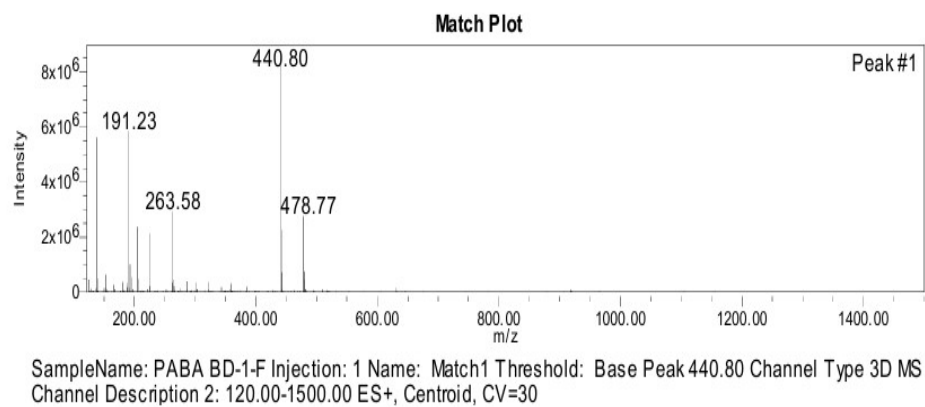

**Figure S6. ESI-MS spectrum of SB1.**

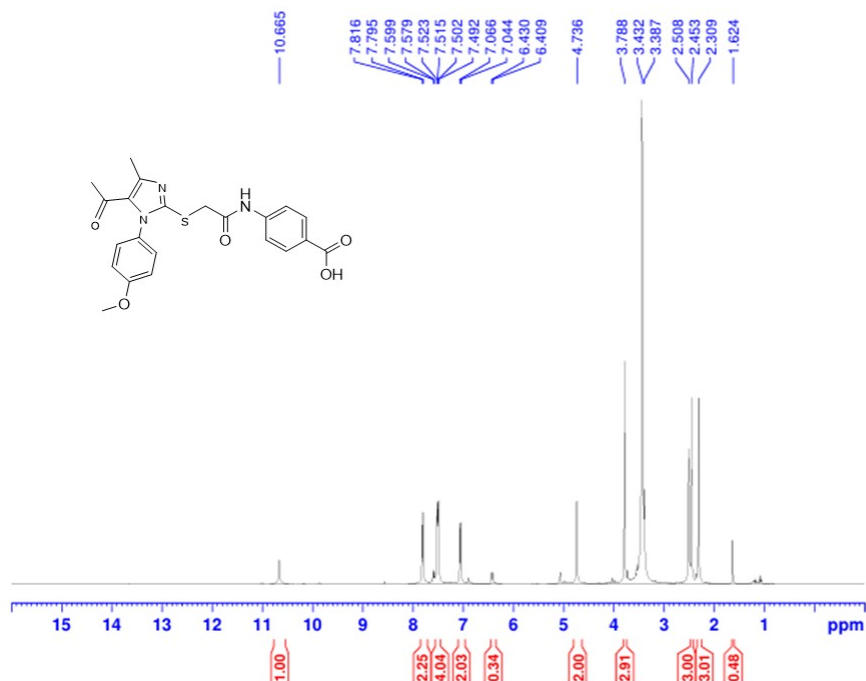

Current Data Parameters  
NAME 2393-GUJARAT UNIVERSITY  
EXPNO 1  
PROCNO 1

F2 - Acquisition Parameters  
Date\_ 20250609  
Time 14.11 h  
INSTRUM Avance  
PROBHD Z166552\_0024 f  
PULPROG zg30  
TD 65536  
SOLVENT DMSO  
NS 24  
DS 0  
SWH 10000.000 Hz  
FIDRES 0.305176 Hz  
AQ 3.2767999 sec  
RG 101  
DM 50.000 usec  
DE 11.14 usec  
TE 297.3 K  
D1 1.0000000 sec  
TDO 1  
SFO1 400.1336012 MHz  
NUC1 1H  
PO 2.67 usec  
P1 8.00 usec  
PLW1 22.3770081 W

F2 - Processing parameters  
SI 65536  
SF 400.1330000 MHz  
WDW EM  
SSB 0  
LB 0.30 Hz  
GB 0  
PC 1.00

Figure S7. <sup>1</sup>H NMR spectrum of SB1.

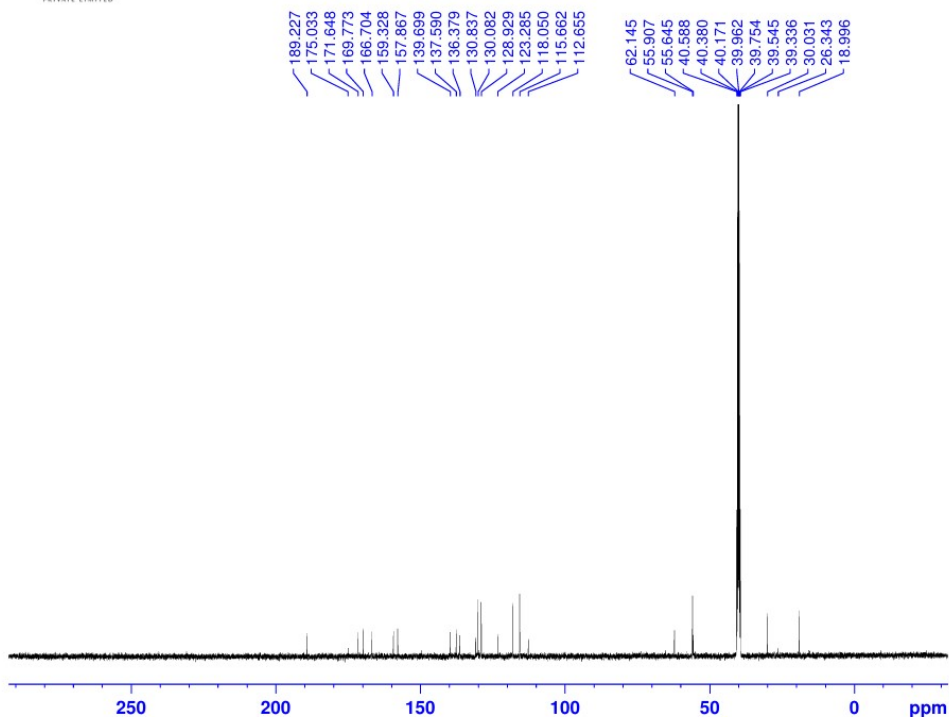

Current Data Parameters  
NAME 2393-GUJARAT UNIVERSITY  
EXPNO 2  
PROCNO 1

F2 - Acquisition Parameters  
Date\_ 20250609  
Time 14.55 h  
INSTRUM Avance  
PROBHD Z166552\_0024 f  
PULPROG zgpg30  
TD 65536  
SOLVENT DMSO  
NS 1024  
DS 0  
SWH 32679.739 Hz  
FIDRES 0.597306 Hz  
AQ 1.0027008 sec  
RG 101  
DM 15.100 usec  
DE 6.50 usec  
TE 298.0 K  
D1 2.0000000 sec  
D11 0.0300000 sec  
TDO 1  
SFO1 100.6258482 MHz  
NUC1 13C  
PO 2.67 usec  
P1 8.00 usec  
PLW1 104.5000000 W  
SFO2 400.1316005 MHz  
NUC2 1H  
CPDPRG2 A000  
PCPD2 90.00 usec  
PLW2 22.3770081 W  
PLW12 0.17681000 W  
PLW13 0.08893200 W

F2 - Processing parameters  
SI 32768  
SF 100.6127685 MHz  
WDW EM  
SSB 0  
LB 1.00 Hz  
GB 0  
PC 1.40

Figure S8. <sup>13</sup>C NMR spectrum of SB1.

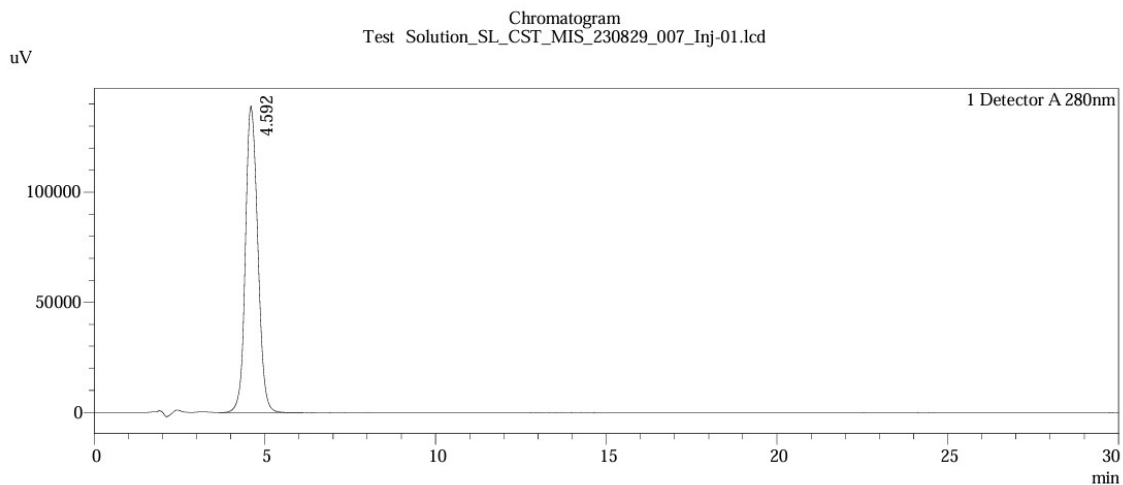

Peak Table Test Solution\_SL\_CST\_MIS\_230829\_007\_Inj-01.lcd

| Peak# | Ret. Time | Name | Area    | Area%   | Tailing Factor | Theoretical Plates/meter(USP) |
|-------|-----------|------|---------|---------|----------------|-------------------------------|
| 1     | 4.592     | SB-1 | 3531599 | 100.000 | 1.126          | 5218                          |
| Total |           |      | 3531599 | 100.000 |                |                               |

**Figure S9: HPLC purity analysis of SB1**

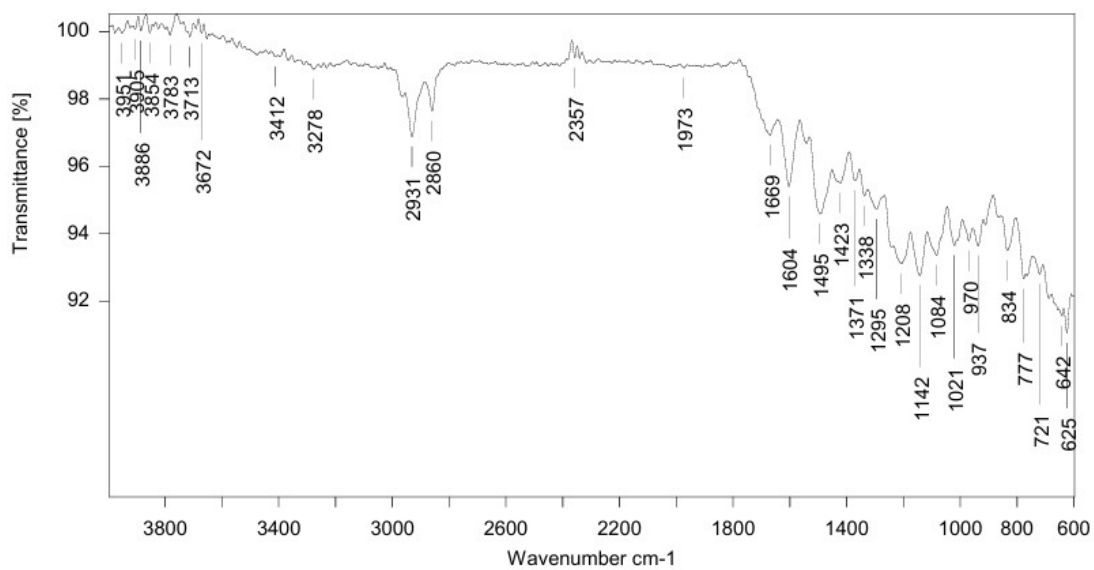

**Figure S10. FTIR spectrum of SB2.**

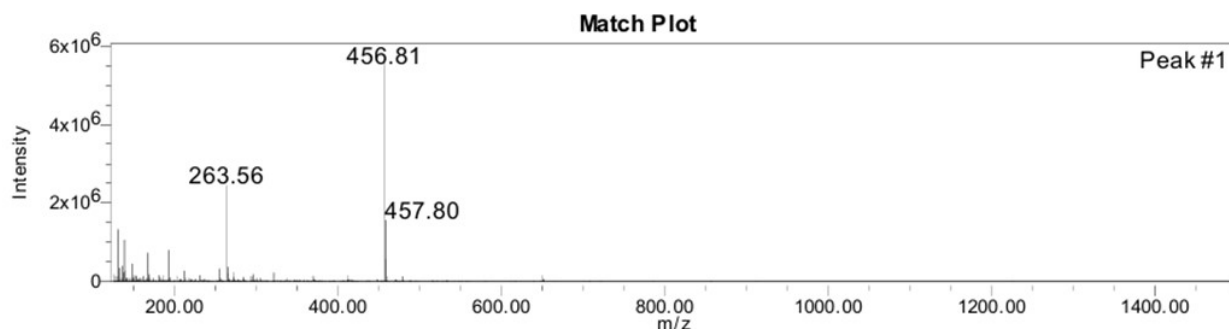

SampleName: SB-2 Injection: 1 Name: Match1 Threshold: Base Peak 456.81 Channel Type 3D MS Channel Description 2: 120.00-1500.00 ES+, Centroid, CV=30

Figure S11. ESI-MS spectrum of SB2.

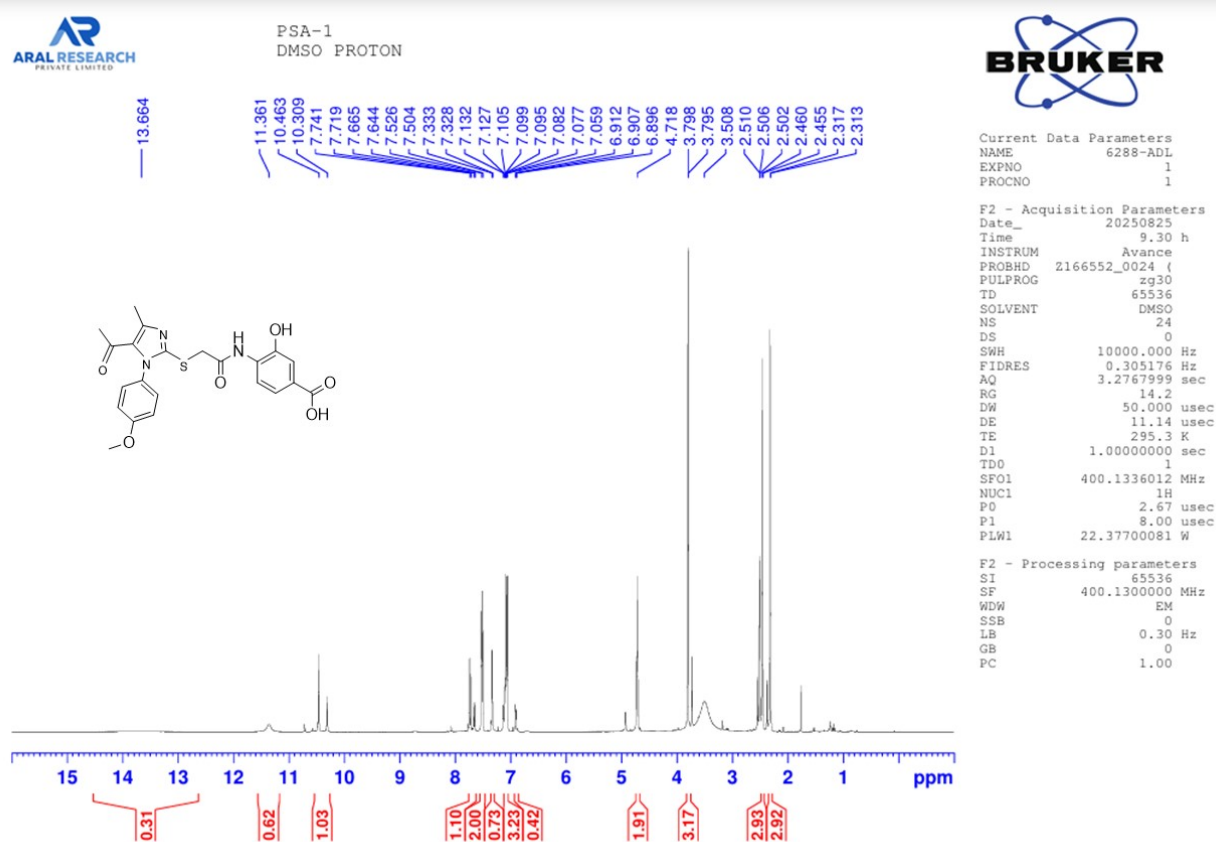

Figure S12. <sup>1</sup>H NMR spectrum of SB2.

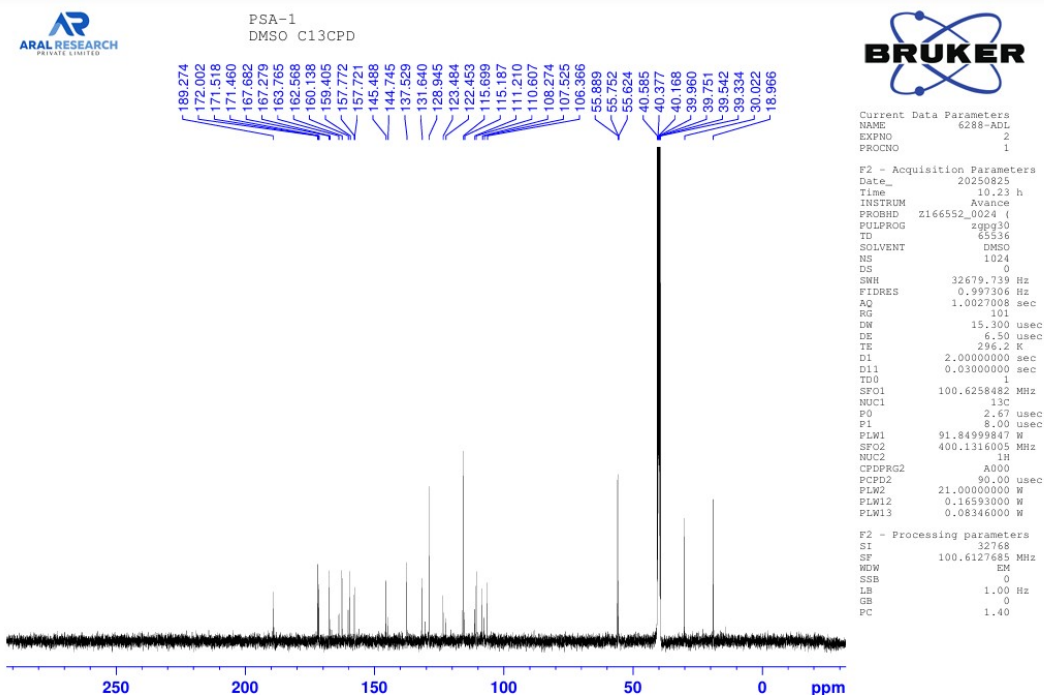

Figure S13. <sup>13</sup>C NMR spectrum of SB2.

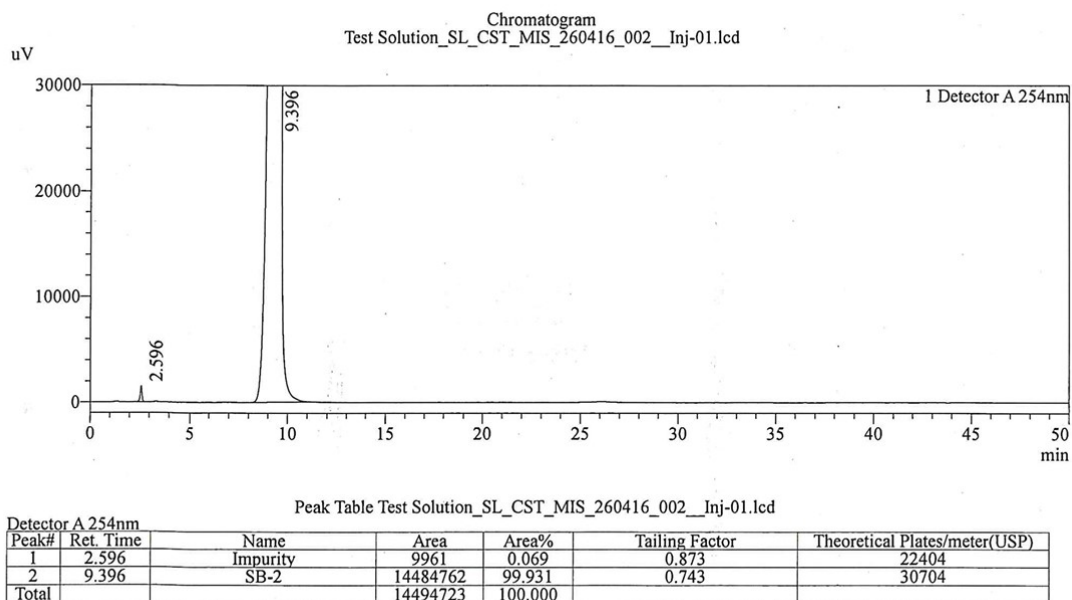

Figure S14: HPLC purity assay of SB2

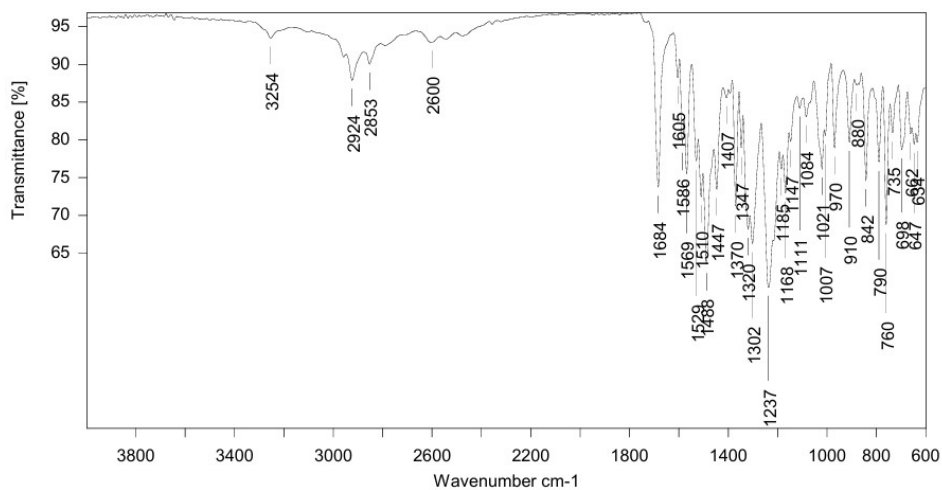

Figure S15. FTIR spectrum of SB3.

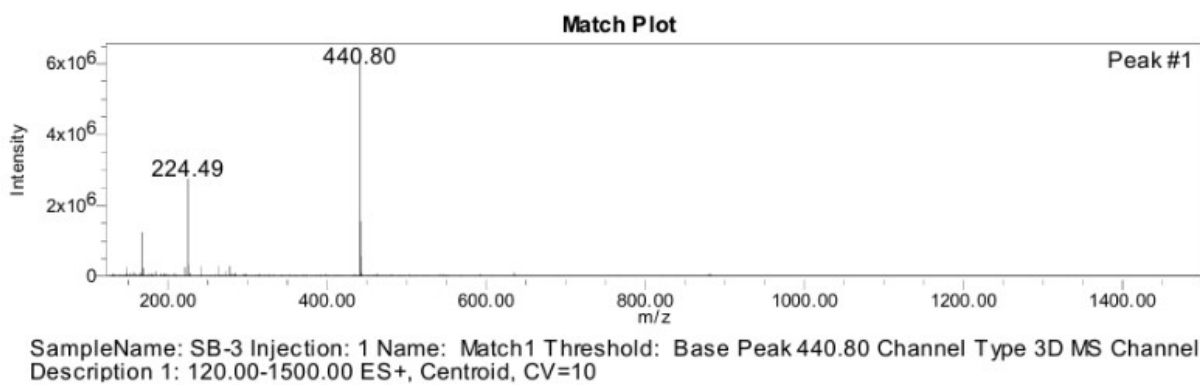

Figure S16. ESI-MS spectrum of SB3.

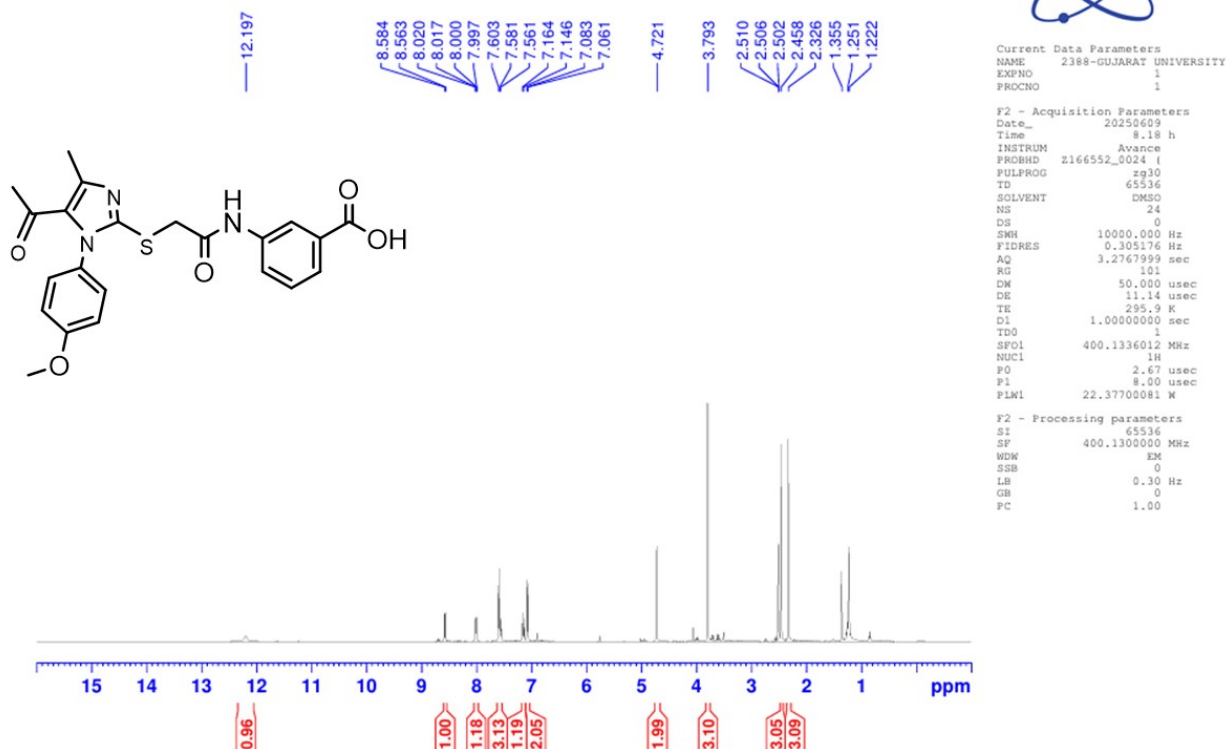

Figure S17. <sup>1</sup>H NMR spectrum of SB3.

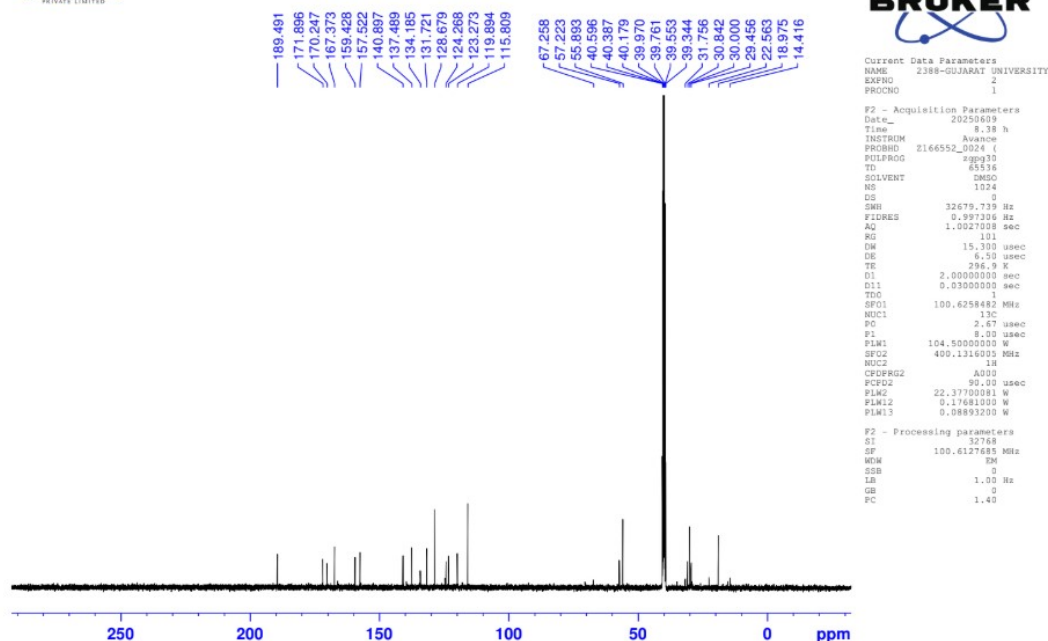

Figure S18. <sup>13</sup>C NMR spectrum of SB3.

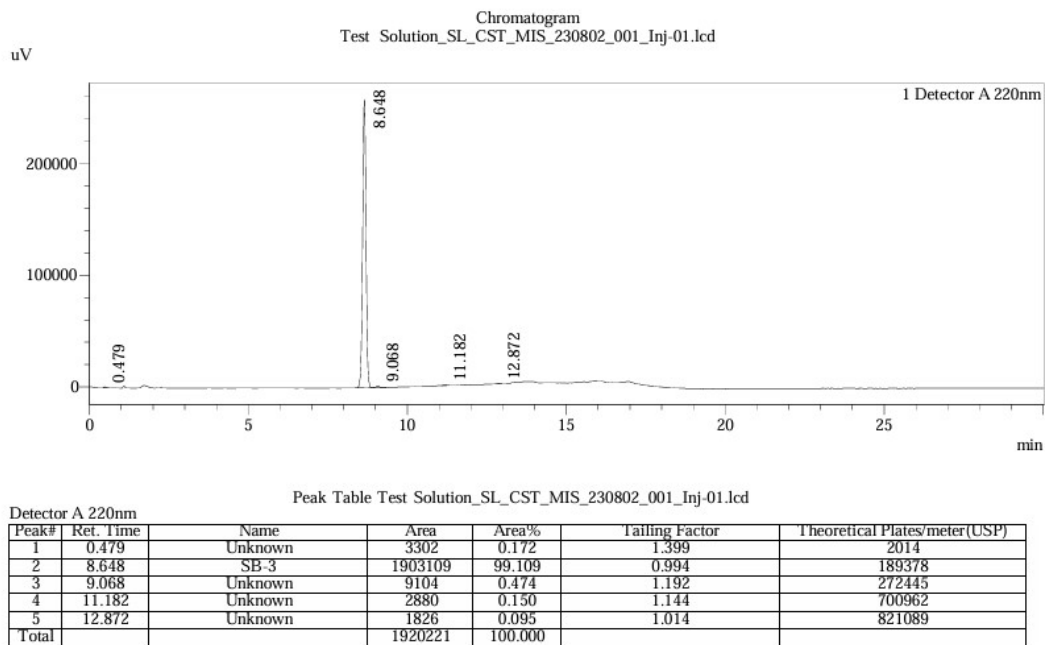

**Figure S19. HPLC purity assay of SB3**

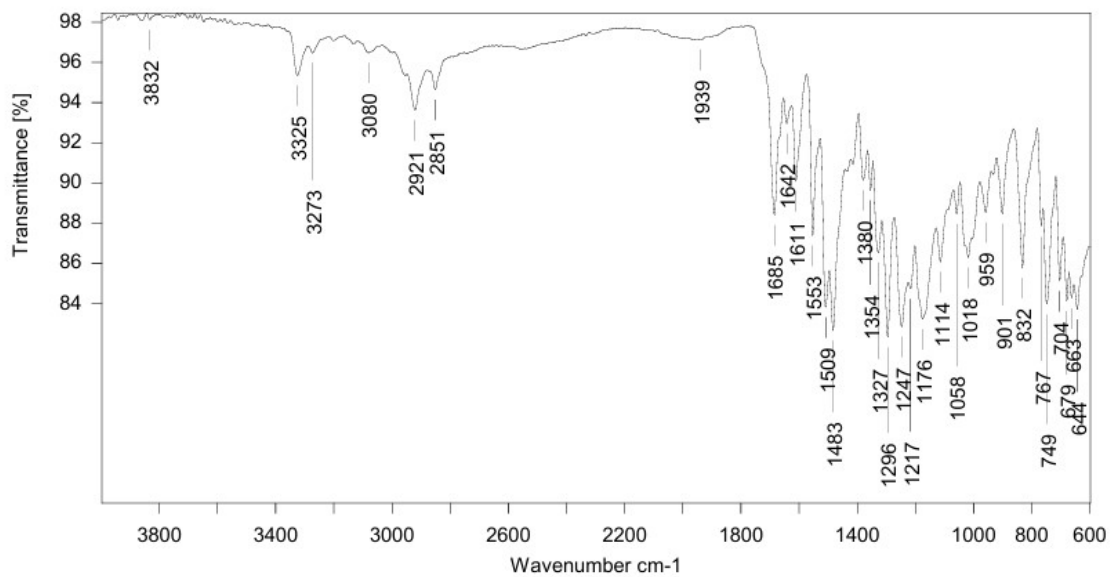

**Figure S20. FTIR spectrum of SB4.**

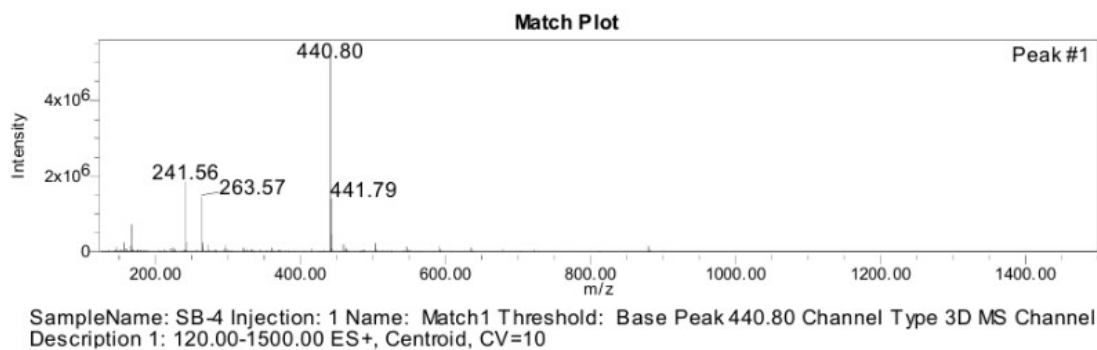

**Figure S21. ESI-MS spectrum of SB4.**

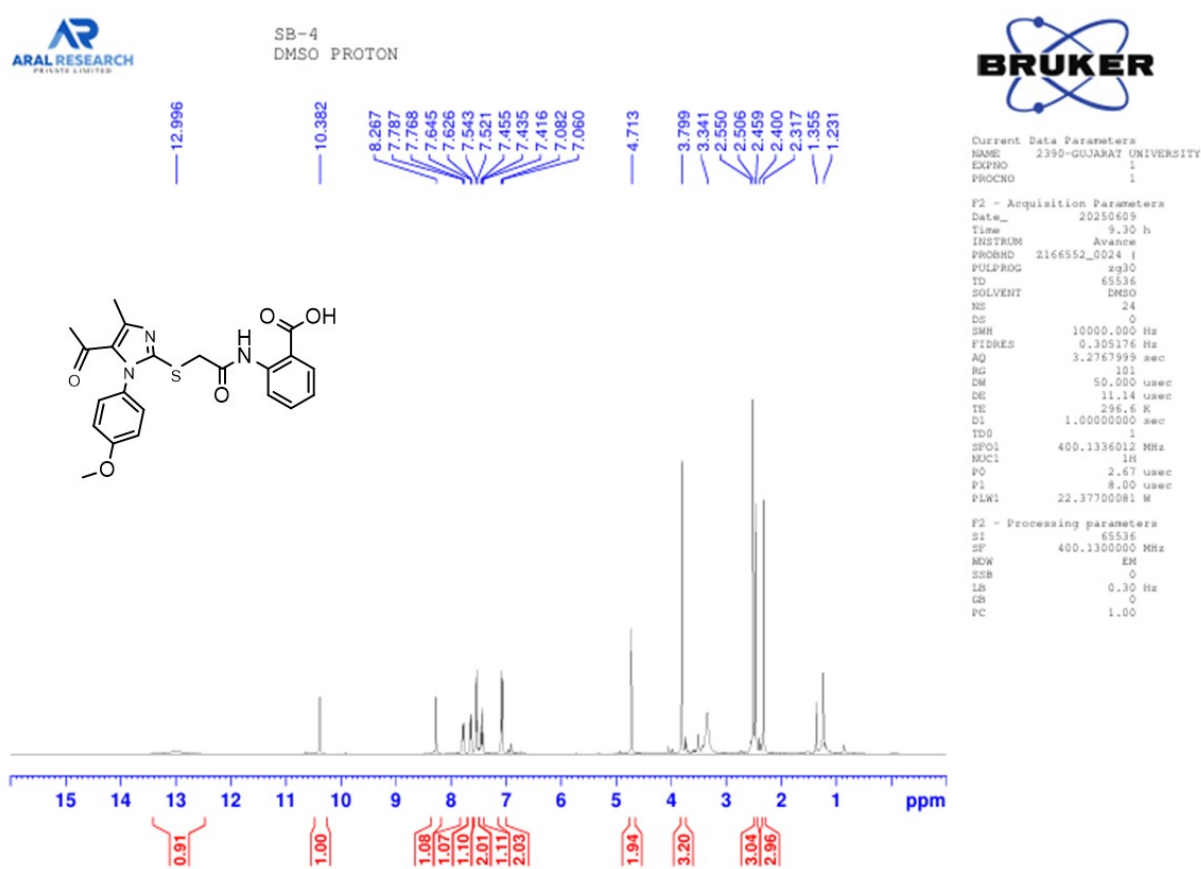

**Figure S22. <sup>1</sup>H NMR spectrum of SB4.**

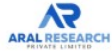

SB-4  
DMSO C13CPD

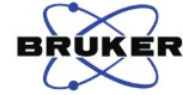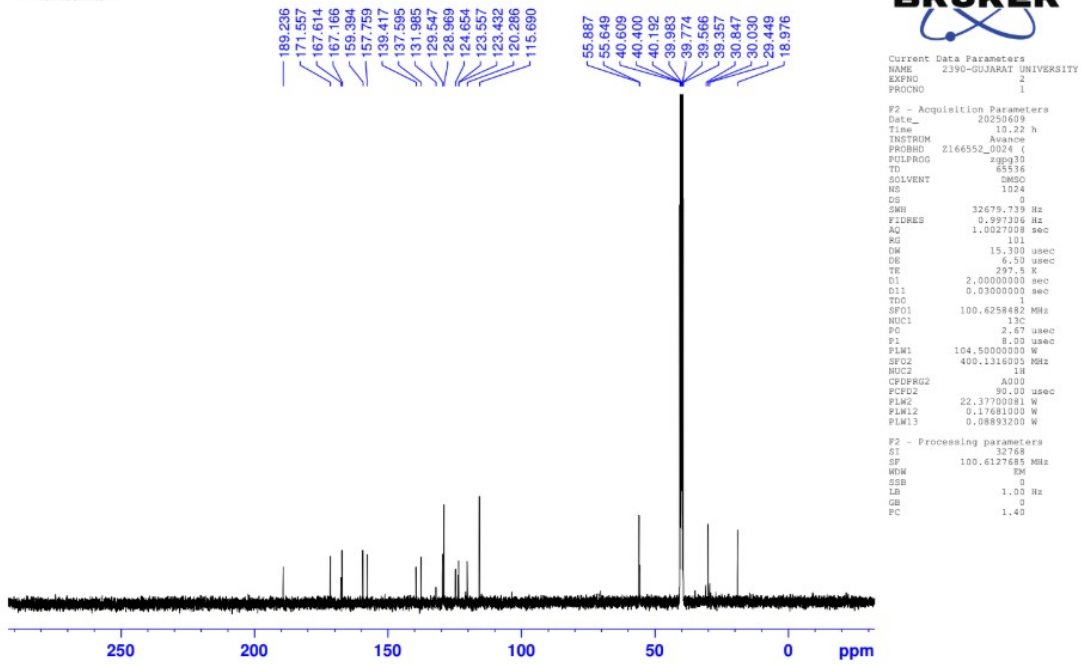

Figure S23. <sup>13</sup>C NMR spectrum of SB4.

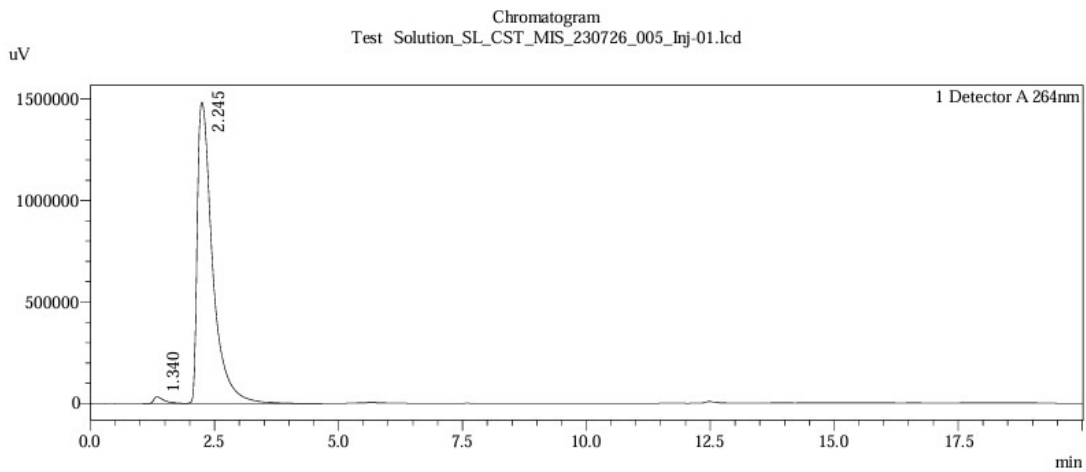

Peak Table Test Solution\_SL\_CST\_MIS\_230726\_005\_Inj-01.lcd

| Peak# | Ret. Time | Name     | Area     | Area%   | Tailing Factor | Theoretical Plates/meter(USP) |
|-------|-----------|----------|----------|---------|----------------|-------------------------------|
| 1     | 1.340     | Impurity | 463051   | 1.431   | 2.088          | 1507                          |
| 2     | 2.245     | SB-4     | 31889161 | 98.569  | 2.374          | 2112                          |
| Total |           |          | 32352212 | 100.000 |                |                               |

Figure S24. HPLC purity assay of SB4

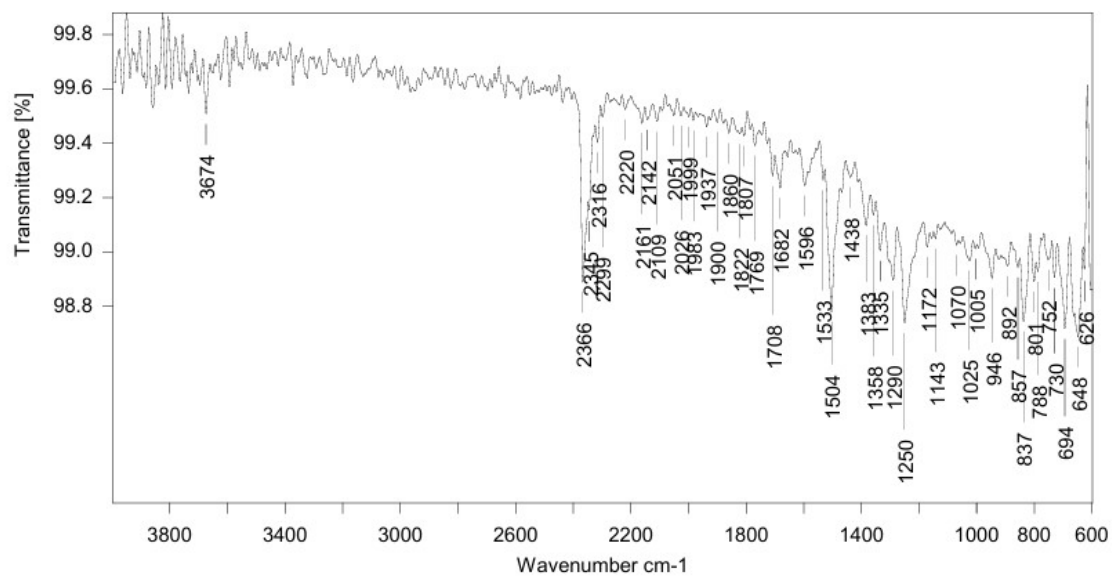

Figure S25. FTIR spectrum of SB5.

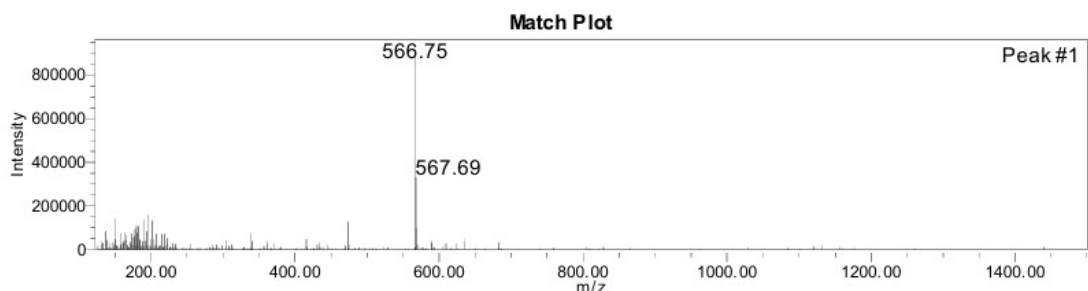

SampleName: COMPOUND\_SB-8 Injection: 1 Name: Match1 Threshold: Base Peak 566.75 Channel Type 3D MS Channel Description 2: 120.00-1500.00 ES+, Centroid, CV=30

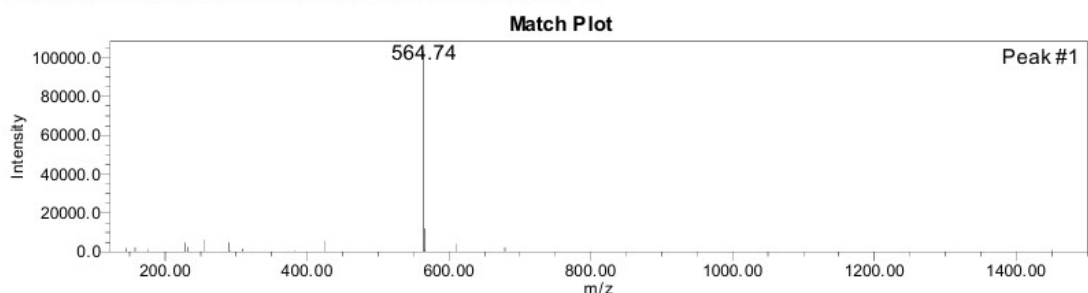

SampleName: COMPOUND\_SB-8 Injection: 1 Name: Match1 Threshold: Base Peak 564.74 Channel Type 3D MS Channel Description 4: 120.00-1500.00 ES-, Centroid, CV=30

Figure S26. ESI-MS spectrum of SB5.

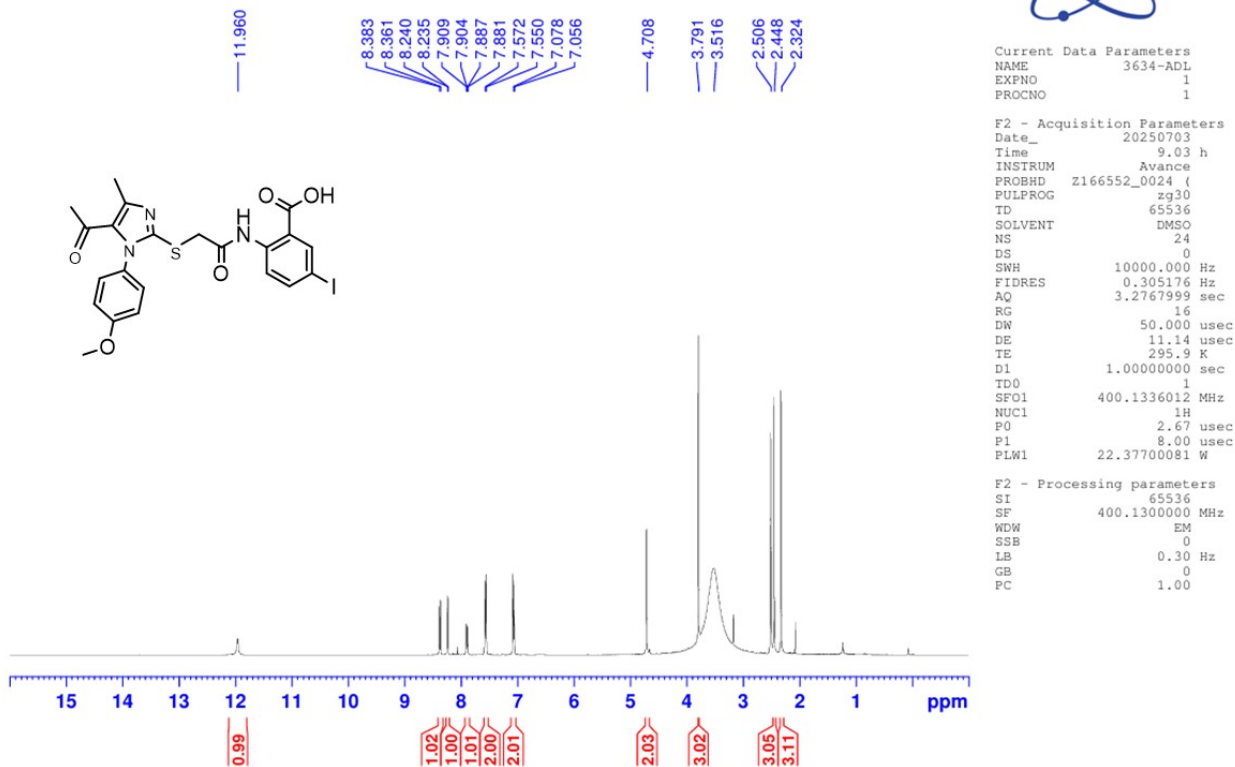

Figure S27. <sup>1</sup>H NMR spectrum of SB5.

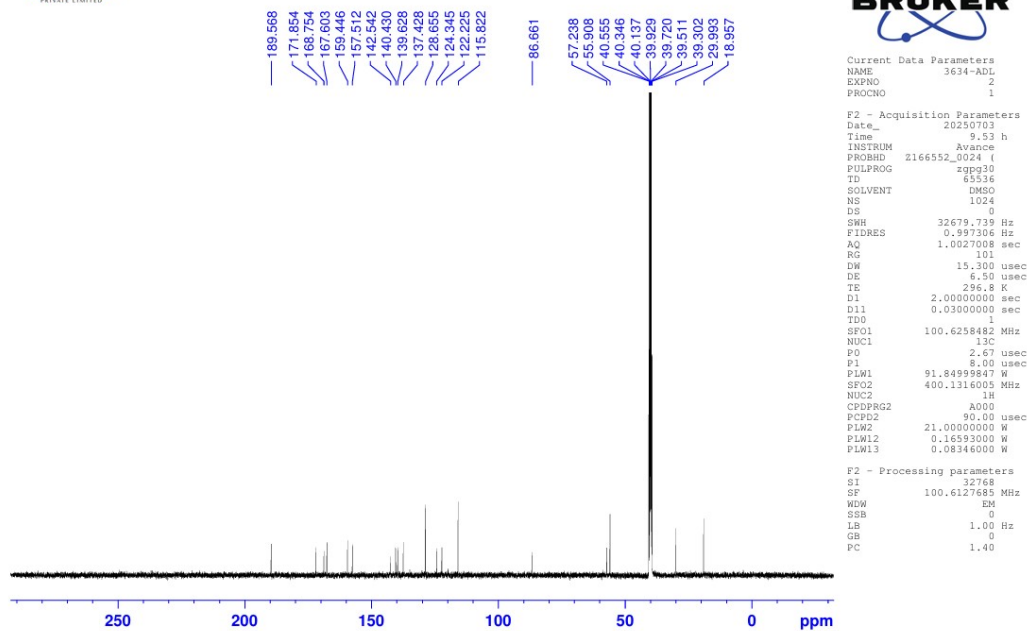

Figure S28. <sup>13</sup>C NMR spectrum of SB5.

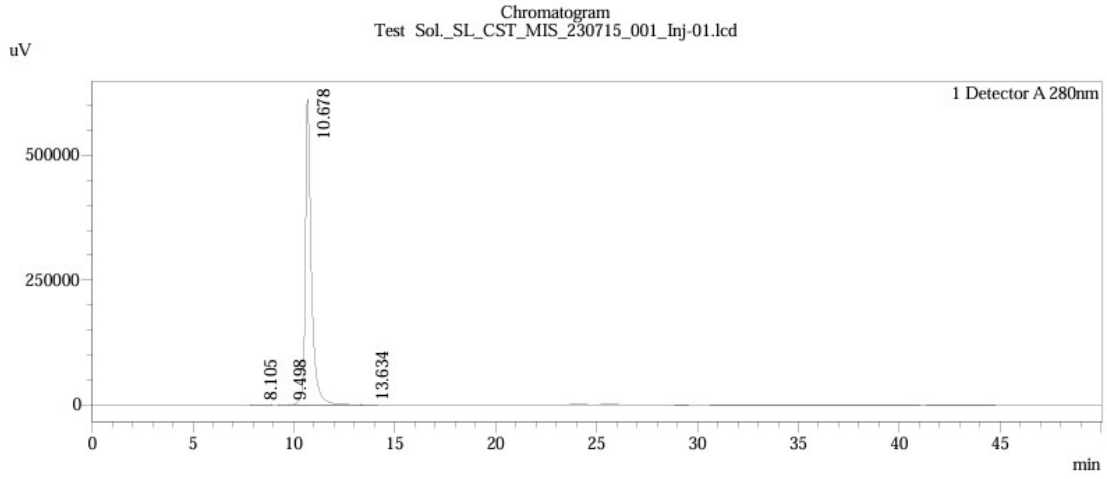

Peak Table Test Sol\_SL\_CST\_MIS\_230715\_001\_Inj-01.lcd

| Peak# | Ret. Time | Name    | Area     | Area%   | Tailing Factor | Theoretical Plates/meter(USP) |
|-------|-----------|---------|----------|---------|----------------|-------------------------------|
| 1     | 8.105     | Unknown | 7435     | 0.059   | 2.360          | 25357                         |
| 2     | 9.498     | Unknown | 2799     | 0.022   | 0.957          | 70927                         |
| 3     | 10.678    | SB-5    | 12593152 | 99.896  | 1.550          | 52140                         |
| 4     | 13.634    | Unknown | 2824     | 0.022   | 1.618          | 110539                        |
| Total |           |         | 12606211 | 100.000 |                |                               |

**Figure S29. HPLC purity assay of SB5**

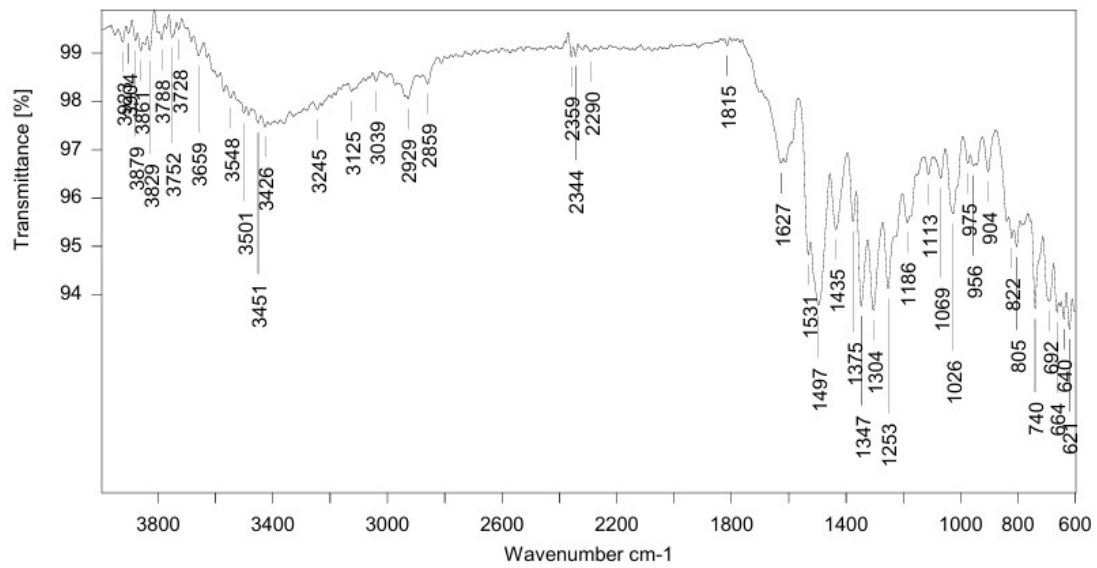

**Figure S30. FTIR spectrum of SB6.**

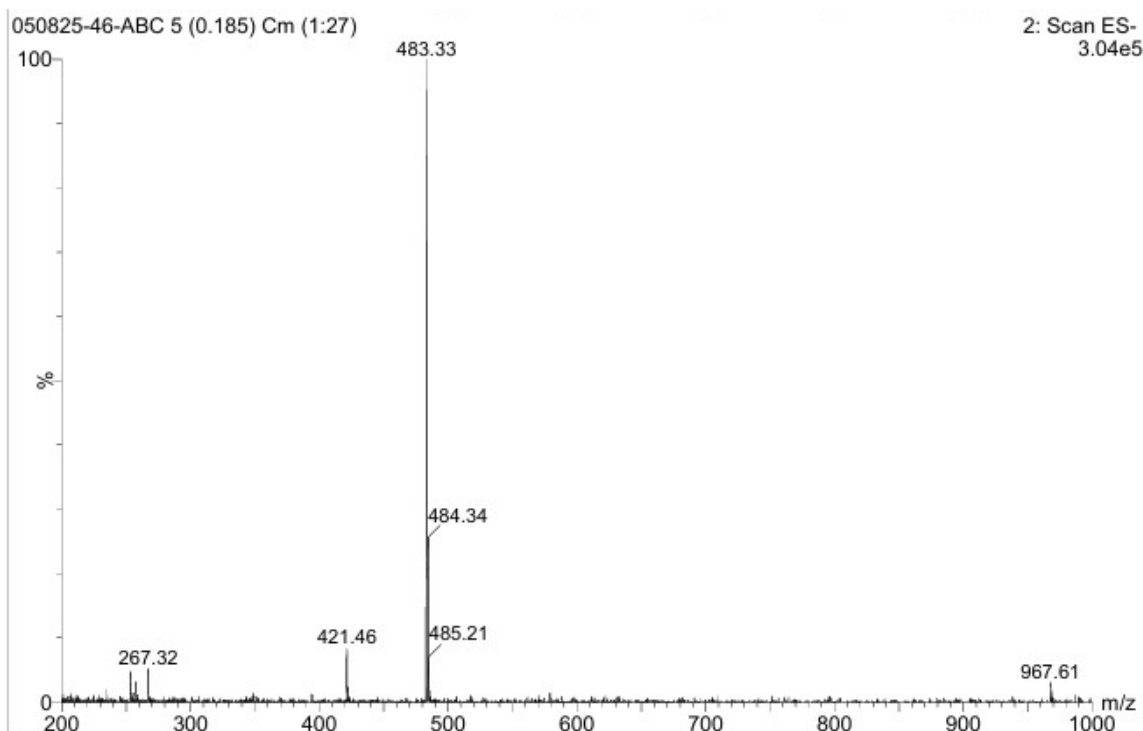

Figure S31. ESI-MS spectrum of SB6.

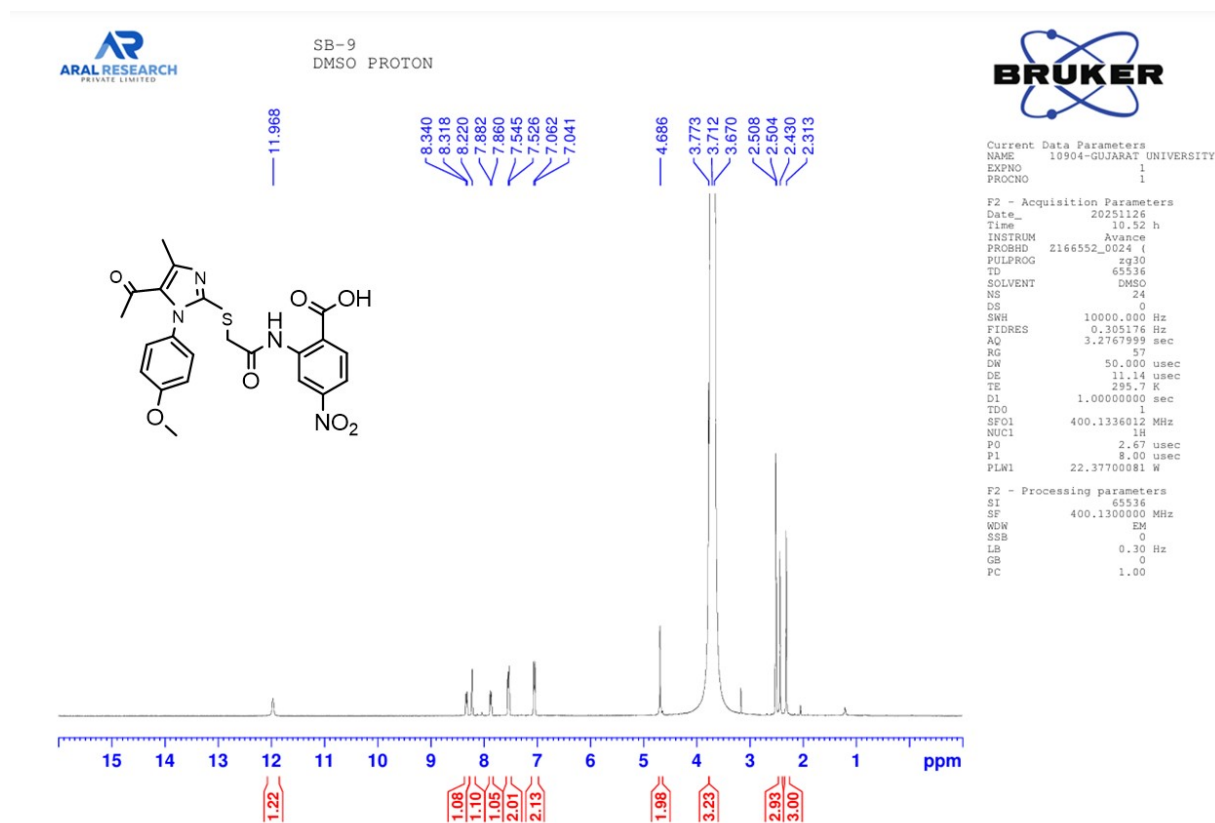

Figure S32. <sup>1</sup>H NMR spectrum of SB6.

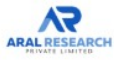

SB-9  
DMSO C13CPD

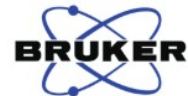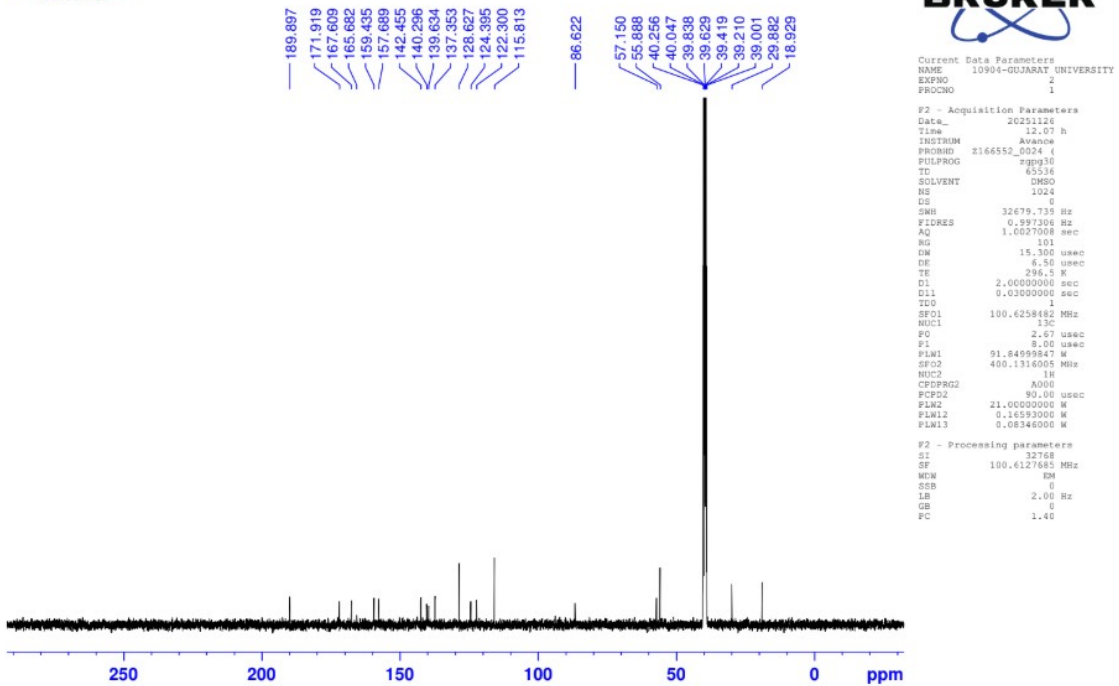

Figure S33. <sup>13</sup>C NMR spectrum of SB6.

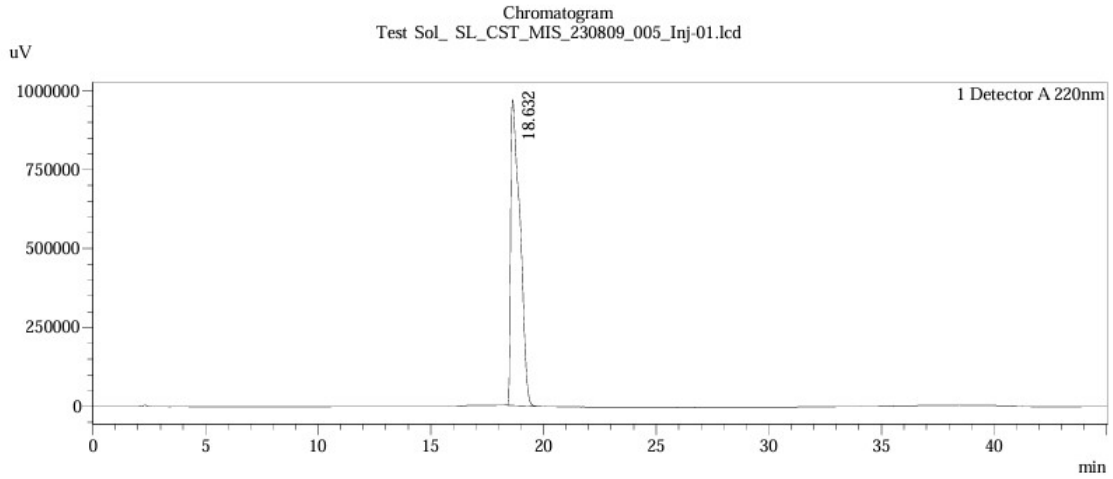

Peak Table Test Sol\_ SL\_CST\_MIS\_230809\_005\_Inj-01.lcd

| Peak# | Ret. Time | Name | Area     | Area%   | Tailing Factor | Theoretical Plates/meter(USP) |
|-------|-----------|------|----------|---------|----------------|-------------------------------|
| 1     | 18.632    | SB-6 | 27547040 | 100.000 | 2.582          | 59916                         |
| Total |           |      | 27547040 | 100.000 |                |                               |

Figure S34. HPLC purity assay of SB6

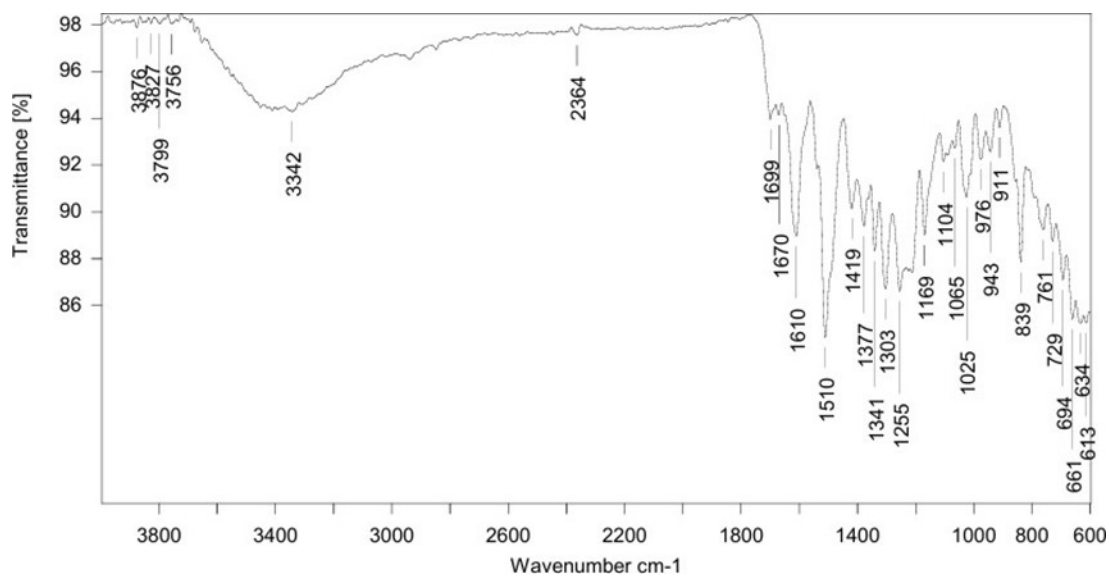

Figure S35. FTIR spectrum of SB7.

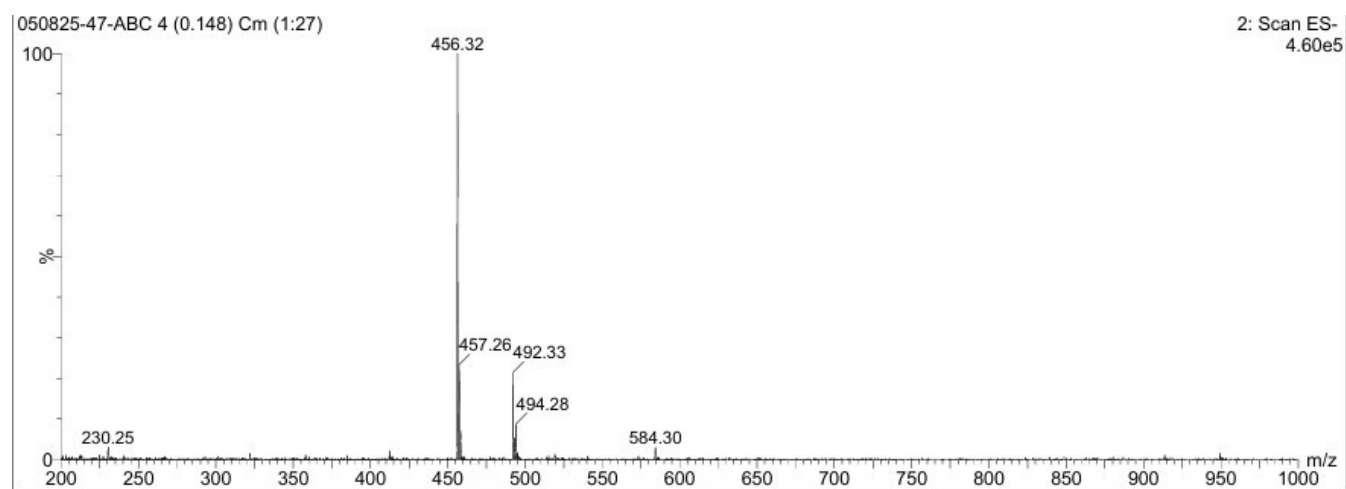

Figure S36. ESI-MS spectrum of SB7.

SB-10/DMSO-D6/Proton

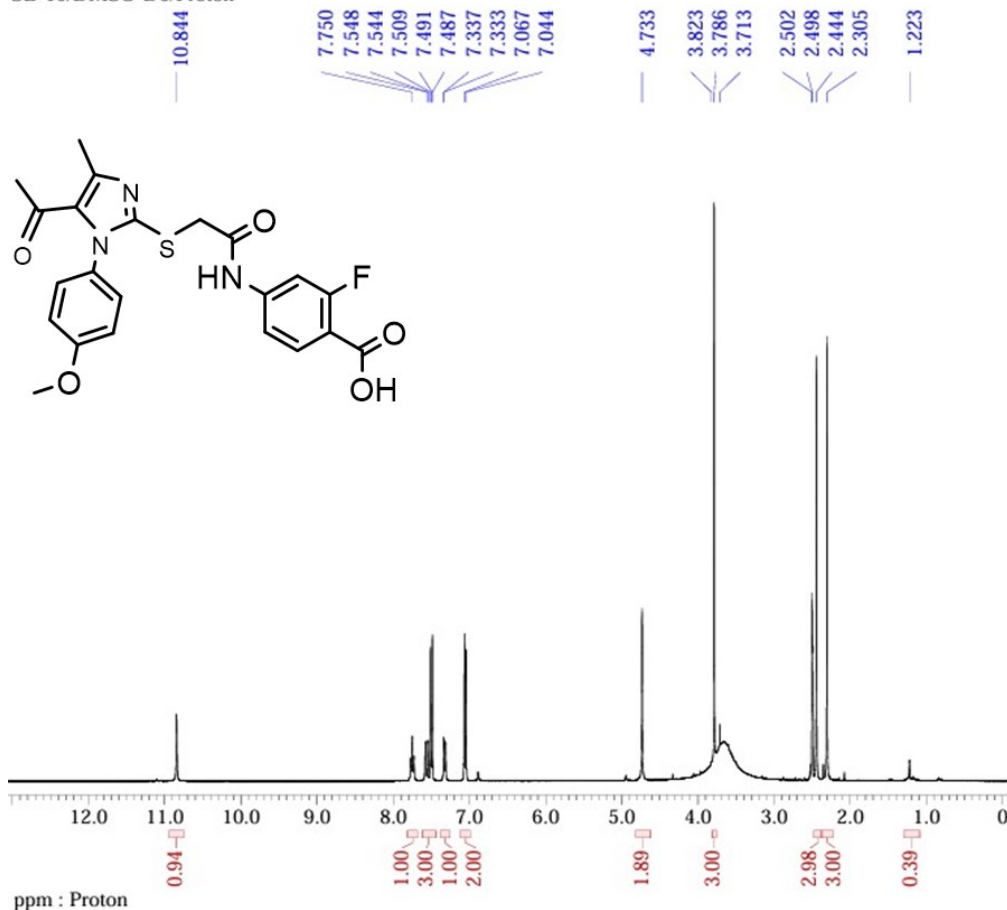

```

---- PROCESSING PARAMETERS ----
sexp( 0.25027[Hz], 0.0[s] )
trapezoid( 0[%], 0[%], 80[%], 100[%] )
zerofill( 4, TRUE )
fft( 1, TRUE, TRUE )
machinphase
ppm
auto_reference( 5[%], TRUE )
reference( 2.49189[ppm], 2.5[ppm] )

Site           = Zasya/NMR400MHz
Filename       = SB-10_PROTON-1-4_jdf
Data Parameter = 
Instrument Name = ECZ400S/L1
Author        = zasya
Solvent       = DMSO-D6
Experiment    = single_pulse_jxp
Actual_Start_Time = 5-AUG-2025 17:54:02
Revision_Time = 6-AUG-2025 09:47:35
X_Domain     = Proton
Dia_Title    = Proton
Dia_Units    = [ppm]
Scans        = 32
X_Sweep_Input = 18[ppm]
X_Offset     = 6.5[ppm]
X_Points     = 17992
Irr_Domain   = Proton
Irr_Offset   = 5[ppm]
Irr_Mode     = Off
X_Acq_Time   = 1.99783168[s]
X_Angle      = 45[deg]
X_Atn        = 1.5[dB]
X_Pulse      = 2.625[us]
X_90_Width   = 5.25[us]
Recvr_Gain   = 42
Relaxation_Delay = 2[s]
Temp_Get     = 25[dC]
Total_Time   = 0 days 00:04:08
  
```

Figure S37. <sup>1</sup>H NMR spectrum of SB7.

SB-10 1/DMSO-D6/Carbon

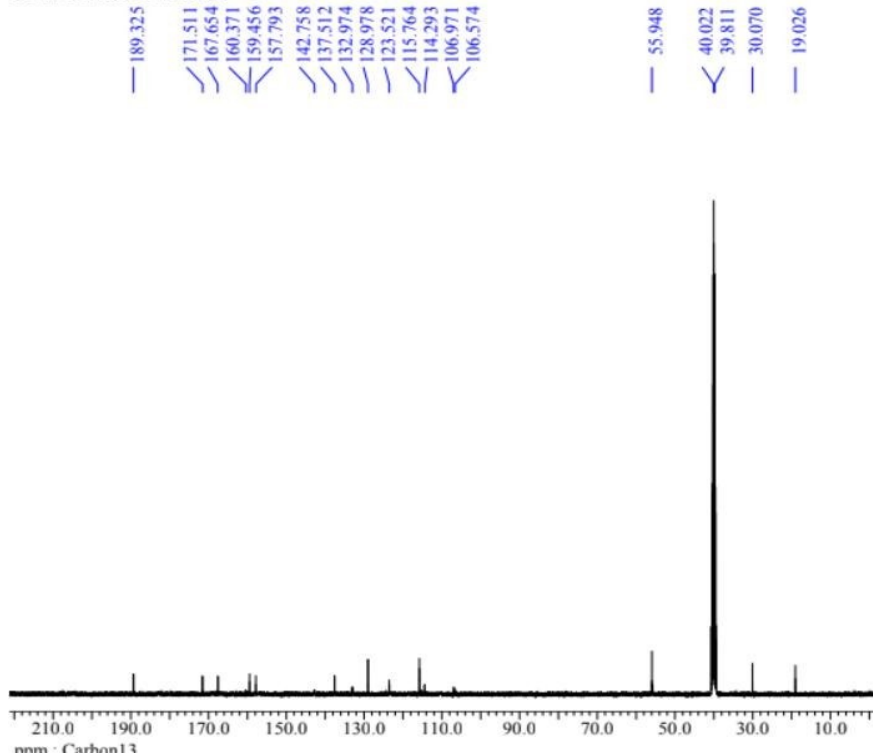

```

---- PROCESSING PARAMETERS ----
sexp( 1.0048[Hz], 0.0[s] )
trapezoid( 0[%], 0[%], 80[%], 100[%] )
zerofill( 2, TRUE )
fft( 1, TRUE, TRUE )
machinphase
ppm
thresh( 5[%], 1 )
peak_pick( 0[Hz], 0.1[ppm], 0[Hz] )

Derived from: SB-10 1_CARBON-1-1_jdf

Site           = Zasya/NMR400MHz
Filename       = SB-10 1_CARBON-1-2_jdf
Data Parameter = 
Instrument Name = ECZ400S/L1
Author        = zasya
Solvent       = DMSO-D6
Experiment    = carbon_jxp
Actual_Start_Time = 5-AUG-2025 22:41:57
Revision_Time = 6-AUG-2025 09:31:38
X_Domain     = Carbon
Dia_Title    = Carbon13
Dia_Units    = [ppm]
Scans        = 512
X_Sweep_Input = 251.0[ppm]
X_Offset     = 100[ppm]
X_Points     = 31415
Irr_Domain   = Proton
Irr_Offset   = 5[ppm]
X_Acq_Time   = 0.9952272[s]
X_Angle      = 30[deg]
X_Atn        = 4.5[dB]
X_Pulse      = 3.30833333[us]
X_90_Width   = 9.925[us]
Recvr_Gain   = 52
Relaxation_Delay = 2[s]
Temp_Get     = 25[dC]
Total_Time   = 0 days 00:28:48
  
```

Figure S38. <sup>13</sup>C NMR spectrum of SB7.

Current Data Parameters  
NAME 820-GUJARAT UNIVERSITY  
EXPNO 1  
PROCNO 1

F2 - Acquisition Parameters  
Date\_ 20260416  
Time 16.26 h  
INSTRUM Avance  
PROBHD Z166552\_0024 ( (   
PULPROG zgig  
TD 131072  
SOLVENT DMSO  
NS 24  
DS 0  
SWH 147058.824 Hz  
FIDRES 2.243940 Hz  
AQ 0.4456448 sec  
RG 101  
DW 3.400 usec  
DE 6.50 usec  
TE 295.4 K  
D1 1.0000000 sec  
D11 0.0300000 sec  
TD0 1  
SFO1 376.4607164 MHz  
NUC1 19F  
P1 12.00 usec  
PLM1 33.05300140 W  
SFO2 400.1316005 MHz  
NUC2 1H  
CPDPRG2 A000  
PCPD2 90.00 usec  
PLW2 20.65200043 W  
PLW12 0.16317999 W

F2 - Processing parameters  
SI 65536  
SF 376.4983662 MHz  
WDW EM  
SSB 0  
LB 0.30 Hz  
GB 0  
PC 1.00

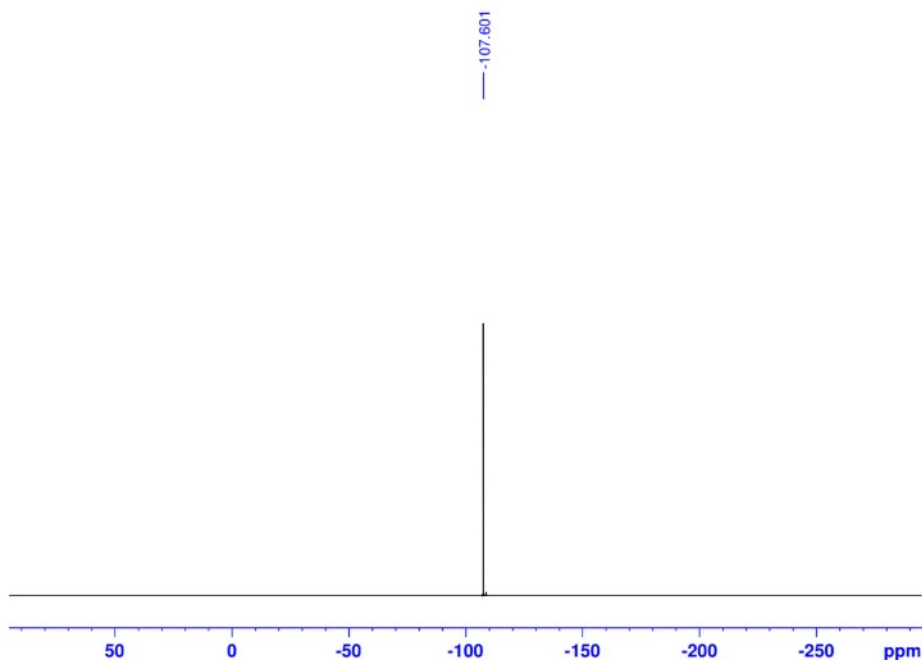

Figure S39. <sup>19</sup>F NMR spectrum of SB7

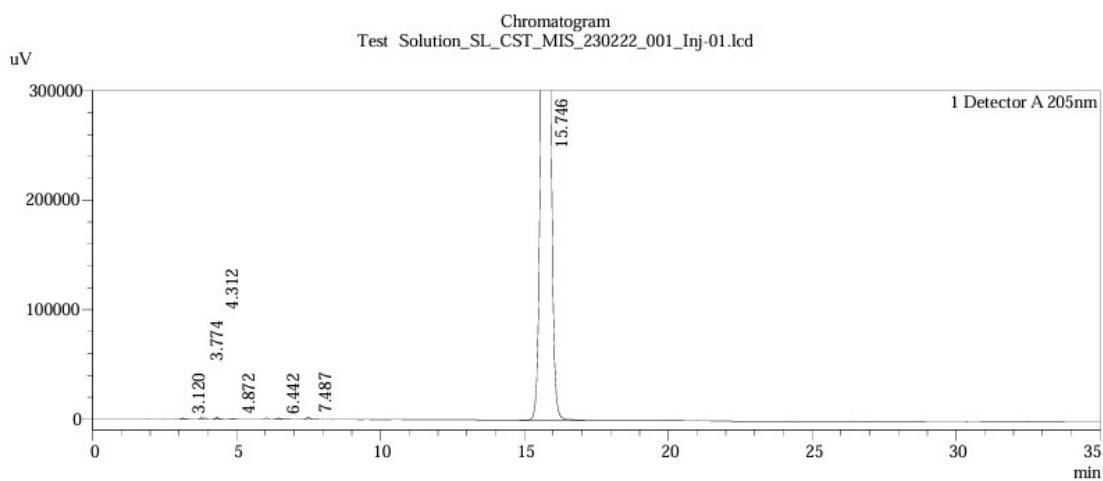

Peak Table Test Solution\_SL\_CST\_MIS\_230222\_001\_Inj-01.lcd

| Peak# | Ret. Time | Name             | Area     | Area%   | Tailing Factor | Theoretical Plates/meter(USP) |
|-------|-----------|------------------|----------|---------|----------------|-------------------------------|
| 1     | 3.120     | Unknown Impurity | 5847     | 0.035   | 1.367          | 43893                         |
| 2     | 3.774     | Unknown Impurity | 5497     | 0.033   | 1.013          | 79346                         |
| 3     | 4.312     | Unknown Impurity | 11209    | 0.068   | 1.401          | 65100                         |
| 4     | 4.872     | Unknown Impurity | 4534     | 0.027   | 1.050          | 72315                         |
| 5     | 6.442     | Unknown Impurity | 5691     | 0.034   | 1.093          | 114580                        |
| 6     | 7.487     | Unknown Impurity | 16140    | 0.097   | 1.102          | 117552                        |
| 7     | 15.746    | SB-7             | 16527980 | 99.705  | 1.021          | 109606                        |
| Total |           |                  | 16576898 | 100.000 |                |                               |

Figure S40. HPLC purity assay of SB7

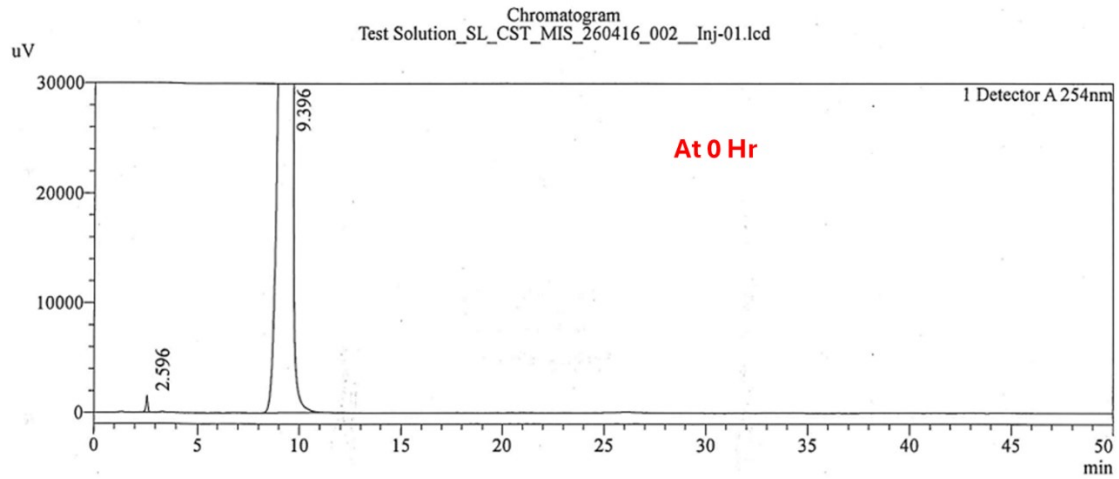

Peak Table Test Solution\_SL\_CST\_MIS\_260416\_002\_Inj-01.lcd

| Detector A 254nm |           |          |          |         |                |                               |
|------------------|-----------|----------|----------|---------|----------------|-------------------------------|
| Peak#            | Ret. Time | Name     | Area     | Area%   | Tailing Factor | Theoretical Plates/meter(USP) |
| 1                | 2.596     | Impurity | 9961     | 0.069   | 0.873          | 22404                         |
| 2                | 9.396     | SB-2     | 14484762 | 99.931  | 0.743          | 30704                         |
| Total            |           |          | 14494723 | 100.000 |                |                               |

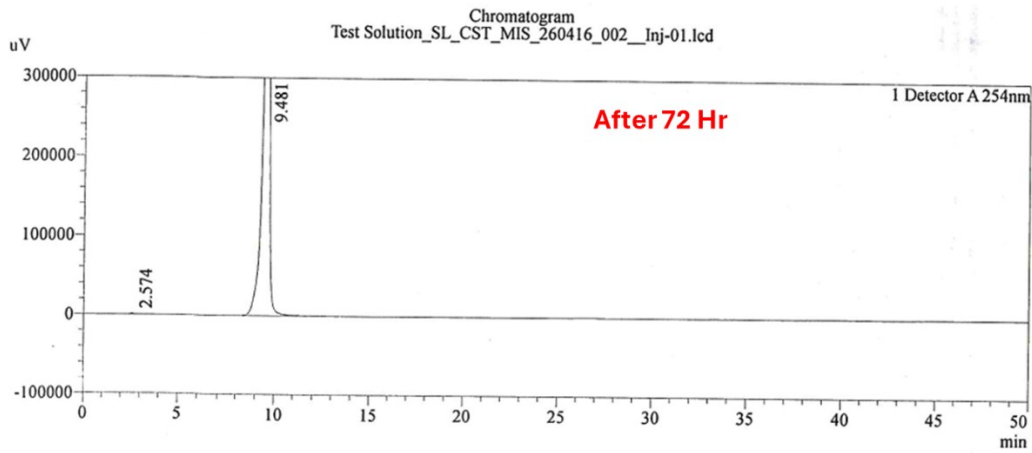

Peak Table Test Solution\_SL\_CST\_MIS\_260416\_002\_Inj-01.lcd

| Detector A 254nm |           |          |          |         |                |                               |
|------------------|-----------|----------|----------|---------|----------------|-------------------------------|
| Peak#            | Ret. Time | Name     | Area     | Area%   | Tailing Factor | Theoretical Plates/meter(USP) |
| 1                | 2.574     | Impurity | 9578     | 0.067   | 0.956          | 22506                         |
| 2                | 9.481     | SB-2     | 14372988 | 99.933  | 0.837          | 34338                         |
| Total            |           |          | 14382566 | 100.000 |                |                               |

**Figure S41: HPLC stability assay for SB2**

Antimicrobial Evolution against MRSA (60 ug/ml)

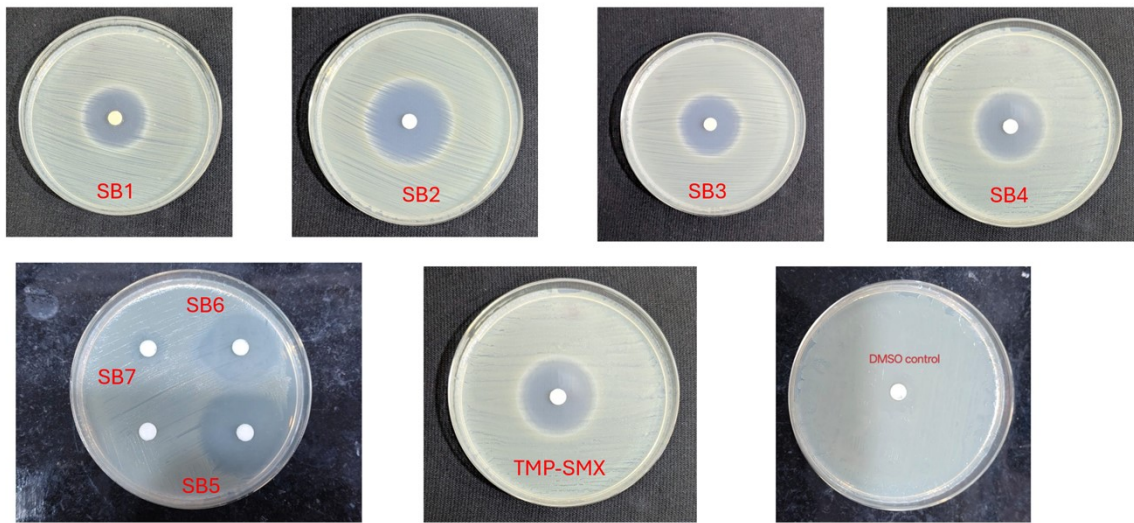

Figure S42. Images of inhibition zone of compound SB1-SB7 in comparison with SUL-TMP against MRSA

Antimicrobial Evolution against XDR E.coli (60 ug/ml)

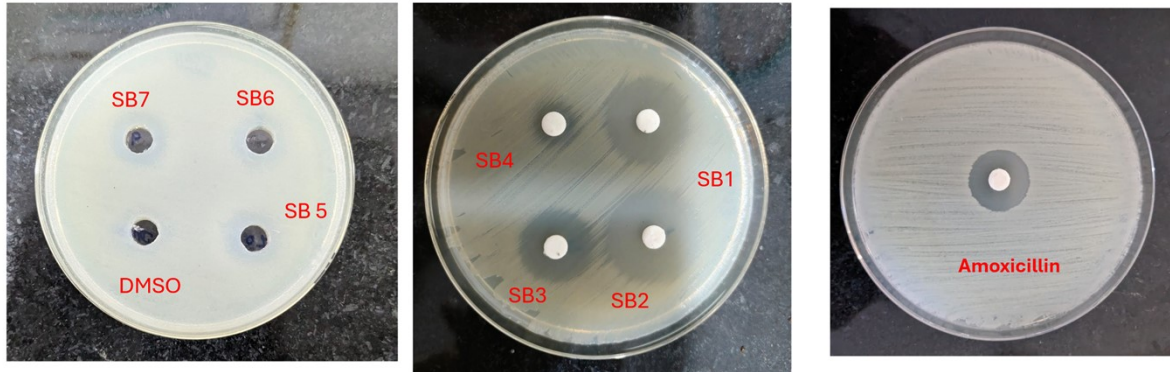

Figure S43. Images of inhibition zone of compound SB1-SB7 in comparison with Amoxicillin against XDR E.coli

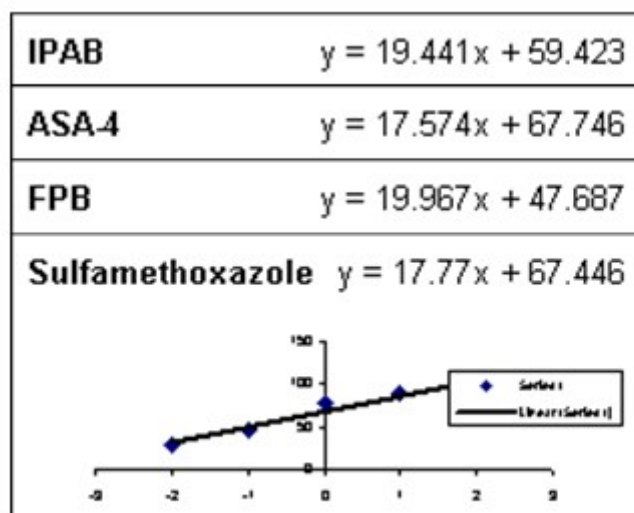

Figure S44. Dose–response curve of compounds against DHPS

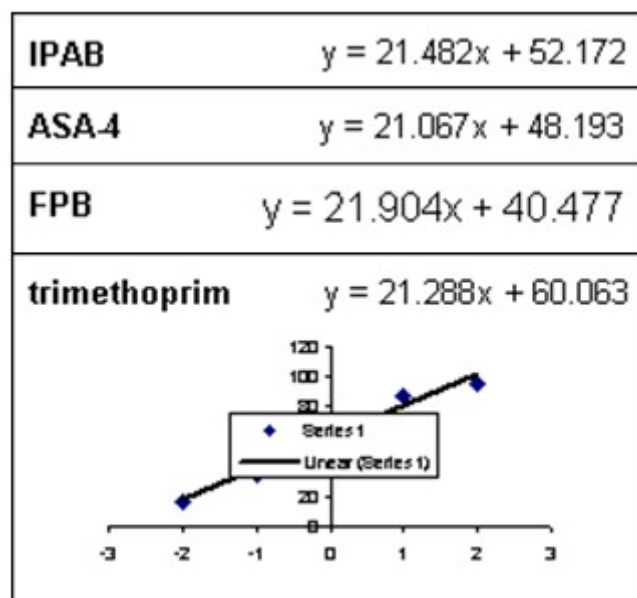

Figure S45. Dose–response curve of compounds against DHFR

Table S1. MIC Determination against MRSA and XDR *E.coli*

| Compound SB2        | MRSA (µg/mL) | XDR <i>E.coli</i> (µg/mL) | Compound SB5(µg/mL) | MRSA (µg/mL) | XDR <i>E.coli</i> (µg/mL) |
|---------------------|--------------|---------------------------|---------------------|--------------|---------------------------|
| Replicate 1         | 2            | 8                         | Replicate 1         | 2            | 16                        |
| Replicate 2         | 2            | 8                         | Replicate 2         | 2            | 16                        |
| Replicate 3         | 2            | 8                         | Replicate 3         | 2            | 16                        |
| <b>Reported MIC</b> | <b>2</b>     | <b>8</b>                  | <b>Reported MIC</b> | <b>2</b>     | <b>16</b>                 |
